# 1 **Differential response of *Candida* species morphologies and** 2 **isolates to fluconazole and boric acid**

3 **Ola E. Salama, Aleeza C. Gerstein**

## 4 **Abstract**

5 *Candida albicans* is the most prevalent cause of vulvovaginal candidiasis ('yeast  
6 infection') and recurrent vulvovaginal candidiasis, though the incidence of non-*albicans* yeast  
7 species is increasing. The azole fluconazole is the primary antifungal drug used to treat R/VVC  
8 yet isolates from some species have intrinsic resistance to fluconazole, and recurrent infection  
9 can occur even with fluconazole-susceptible populations. The second-line broad-spectrum  
10 antimicrobial drug, boric acid, is an alternative treatment that has been found to successfully treat  
11 complicated VVC infections. Far less is known about how boric acid inhibits growth of yeast  
12 isolates in different morphologies compared to fluconazole. We found significant differences in  
13 drug resistance and drug tolerance (the ability of a subpopulation to grow slowly in high levels of  
14 drug) between *C. albicans*, *C. glabrata*, and *C. parapsilosis* isolates, with the specific  
15 relationships dependent on both drug and phenotype. Population-level variation for both  
16 susceptibility and tolerance was broader for fluconazole than boric acid in all species. Unlike  
17 fluconazole, which neither prevented hyphal formation nor disrupted mature biofilms, boric acid  
18 inhibited *C. albicans* hyphal formation and reduced mature biofilm biomass and metabolic  
19 activity in all isolates in a dose-dependent manner. Variation in planktonic response did not  
20 generally predict biofilm phenotypes. Overall, our findings illustrate that boric acid is broadly  
21 effective at inhibiting growth across many isolates and morphologies, which could explain why it  
22 is an effective treatment for R/VVC.

23

## 24 Introduction

25 Vulvovaginal candidiasis (VVC), a pathological condition of the lower female  
26 reproductive tract, affects ~75% of females at least once in their life (1, 2). Although patients  
27 usually respond well to the first-line treatment (typically fluconazole) (3, 4), ~8% of females  
28 globally will experience recurrent VVC, which can have a significant negative impact on quality  
29 of life (4, 5). *Candida albicans* has been the primary cause (75-90%) of VVC, yet the frequency  
30 of other species, particularly *C. glabrata* followed by *C. parapsilosis*, is increasing (6–8). In light  
31 of the transition to rename *C. glabrata* as *Nakaseomyces glabrata* ,(9), we use the acronym NAC  
32 to refer to "non-albicans clinical" species, rather than "non-albicans *Candida*" species as has been  
33 done historically.

34 Boric acid (BA) intravaginal suppositories are recommended and have found success as a  
35 second-line treatment for NAC infections and when recurrence occurs on first-line treatment,  
36 typically fluconazole (FLC) (3, 4, 10, 11). Despite this success, BA remains a second-line  
37 treatment because its exact mechanism of action is unknown and much less work has evaluated its  
38 broad efficacy and possible long-term effects (12, 13). The minimum inhibitory concentration of  
39 BA was previously measured in a relatively small number of *C. albicans*, *C. glabrata*, and *C.*  
40 *parapsilosis* isolates (13, 14), yet unlike FLC (and many other antifungal drugs), there are no  
41 standard clinical methods for drug resistance testing, nor have breakpoints been established for  
42 BA planktonic resistance. Furthermore, variation among isolates in fungal drug tolerance, the  
43 ability of a subpopulation of drug-susceptible isolates to grow slowly at inhibitory drug  
44 concentrations (15–18), has largely been ignored, yet recent studies are beginning to implicate  
45 tolerance as a factor in predicting drug efficacy (16–18).

46 Morphological plasticity is an important virulence trait in many contexts for *Candida*  
47 species (19). The yeast to hyphal transition is critical for biofilm stability, penetration of host  
48 epithelial cells, and escape from host phagocytes (20, 21). Hyphal formation is also important for  
49 biofilm formation in *C. albicans* (*C. glabrata* do not form hyphae and *C. parapsilosis* forms  
50 pseudohyphae) (22). The involvement of biofilms in RVVC is still being debated (23, 24).  
51 However, hyphal forms were recently detected in vaginal lavage fluid from an RVVC patient (25).  
52 *In vivo* mice models showed that *C. albicans* can form biofilms on the vaginal mucosa (23, 24)  
53 and genes involved in hyphal morphogenesis biofilm formation were detected in vaginal lavage  
54 (25). FLC was shown previously not to inhibit hyphal formation (26). However, low BA

55 concentrations (0.02 mg/mL) can disrupt the cytoskeleton of hyphae by changing the actin  
56 distribution from the apical to the isotropic pattern (27), and higher BA concentrations (10 mg/mL  
57 or 50 mg/mL) were shown to inhibit hyphal formation in two *C. albicans* isolates (13). BA has  
58 also been found to reduce the biomass of mature biofilms relative to biofilms growing without  
59 drug (13); it was unclear, however, whether this reflected the drug simply stopping further growth,  
60 or whether boric acid acted to reduce the biofilm below pre-drug treatment levels.

61 To quantify the diversity of BA phenotypic responses among different species, we  
62 compared FLC and BA planktonic susceptibility and tolerance among 235 clinical isolates of *C.*  
63 *albicans*, *C. glabrata* and *C. parapsilosis*. We also quantify the impact of FLC and BA on *C.*  
64 *albicans* yeast to hyphal transition (leading to biofilm formation), and on *C. albicans* mature  
65 biofilms. We found significant differences among species for drug resistance and tolerance, and a  
66 consistent increase in the variance among isolates for both drug response phenotypes in FLC  
67 compared to BA. We also found that unlike FLC, BA is effective at inhibiting the yeast-to-hyphal  
68 transition and thus biofilm formation, and can effectively break apart mature biofilms. Combined,  
69 this demonstrates multiple pathways where BA is more effective at inhibiting *Candida* species  
70 growth compared to fluconazole.

71

## 72 Results

### 73 Variation in Drug Susceptibility and Tolerance

74 Fluconazole (FLC) and boric acid (BA) drug susceptibility and tolerance were measured  
75 for 235 *Candida* isolates (165 *C. albicans*, 50 *C. glabrata*, 20 *C. parapsilosis*) using *diskImageR*,  
76 a computational analysis tool that quantifies drug response from imagers of disk diffusion assays  
77 (15). Susceptibility was measured as RAD<sub>20</sub> (the radius where 20% of growth reduction occurs),  
78 while tolerance was measured as FoG<sub>20</sub> (the fraction of the population that is able to grow above  
79 RAD<sub>20</sub> after 48 h). *C. albicans* isolates on average had higher susceptibility than *C. glabrata* but  
80 lower susceptibility than *C. parapsilosis*, and higher tolerance than either in FLC (Figure 1, left  
81 panels; Kruskal-Wallis rank-sum test; susceptibility:  $\chi^2 = 63.43$  df = 2,  $P < 0.0001$ , species  
82 differences determined by post-hoc pairwise Wilcoxon tests with the (28)  $P$  adjustment; tolerance:  
83  $\chi^2 = 82.04$ , df = 2,  $P < 0.0001$ ). In BA, *C. albicans* isolates had higher susceptibility than both  
84 NAC species, and lower tolerance than *C. glabrata* (susceptibility:  $\chi^2 = 39.8$ , df = 2,  $P < 0.0001$ ;  
85 tolerance:  $\chi^2 = 97.9$ , df = 2,  $P < 0.0001$ ). The magnitude of isolate variation in BA was significantly  
86 less than in FLC for both *C. albicans* and *C. glabrata*, the two species with a sufficiently large  
87 sample size (Fligner-Killeen test of homogeneity; susceptibility: *C. albicans*,  $\chi^2 = 23.4$ , df = 1,  $P$   
88  $< 0.0001$ ; *C. glabrata*,  $\chi^2 = 7.8$ , df = 1,  $P = 0.005$ ; tolerance: *C. albicans*,  $\chi^2 = 116.59$ , df = 1,  $P <$   
89  $0.0001$ ; *C. glabrata*,  $\chi^2 = 4.94$ , df = 1,  $P = 0.03$ ).

90 There was a significant positive correlation for FLC susceptibility and tolerance within  
91 isolates of the same species: isolates that had lower susceptibility (i.e., higher resistance levels)  
92 also tended to have higher tolerance (Figure 2A, Spearman's rank correlation, for *C. albicans*: rho  
93 = -0.197,  $S = 571000$ ,  $P = 0.02$  *C. glabrata*: rho = -0.49,  $S = 29249$ ,  $P < 0.0001$ , *C. parapsilosis*:  
94 rho = -0.73,  $S = 2295$ ,  $P < 0.0001$ ). In BA, the correlation was significant for *C. glabrata* and *C.*  
95 *parapsilosis* (Figure 2B, *C. glabrata*, rho = -0.42,  $S = 27802$ ,  $P = 0.003$ ; *C. parapsilosis*, rho = -  
96 0.63,  $S = 2173$ ,  $P = 0.003$ ) but not *C. albicans* (rho = 0.07,  $S = 444639$   $P = 0.420$ ). There was no  
97 correlation in susceptibility and tolerance between drugs, indicating that the mode of action for  
98 BA differs from that of FLC, as the isolates that are less susceptible or more tolerant in one drug  
99 do not tend to have improved growth in the other (Figure 2C&D, Spearman's rank correlation,  
100 susceptibility, *C. albicans*:  $S = 500605$ ,  $P = 0.56$ ; *C. glabrata*:  $S = 19549$ ,  $P = 0.99$ ; *C. parapsilosis*:

101  $S = 975, P = 0.26$ ; tolerance, *C. albicans*:  $S = 490557, P = 0.74$ ; *C. glabrata*:  $S = 15401, P = 0.14$ ;  
102 *C. parapsilosis*:  $S = 1332, P = 0.995$ ).  
103

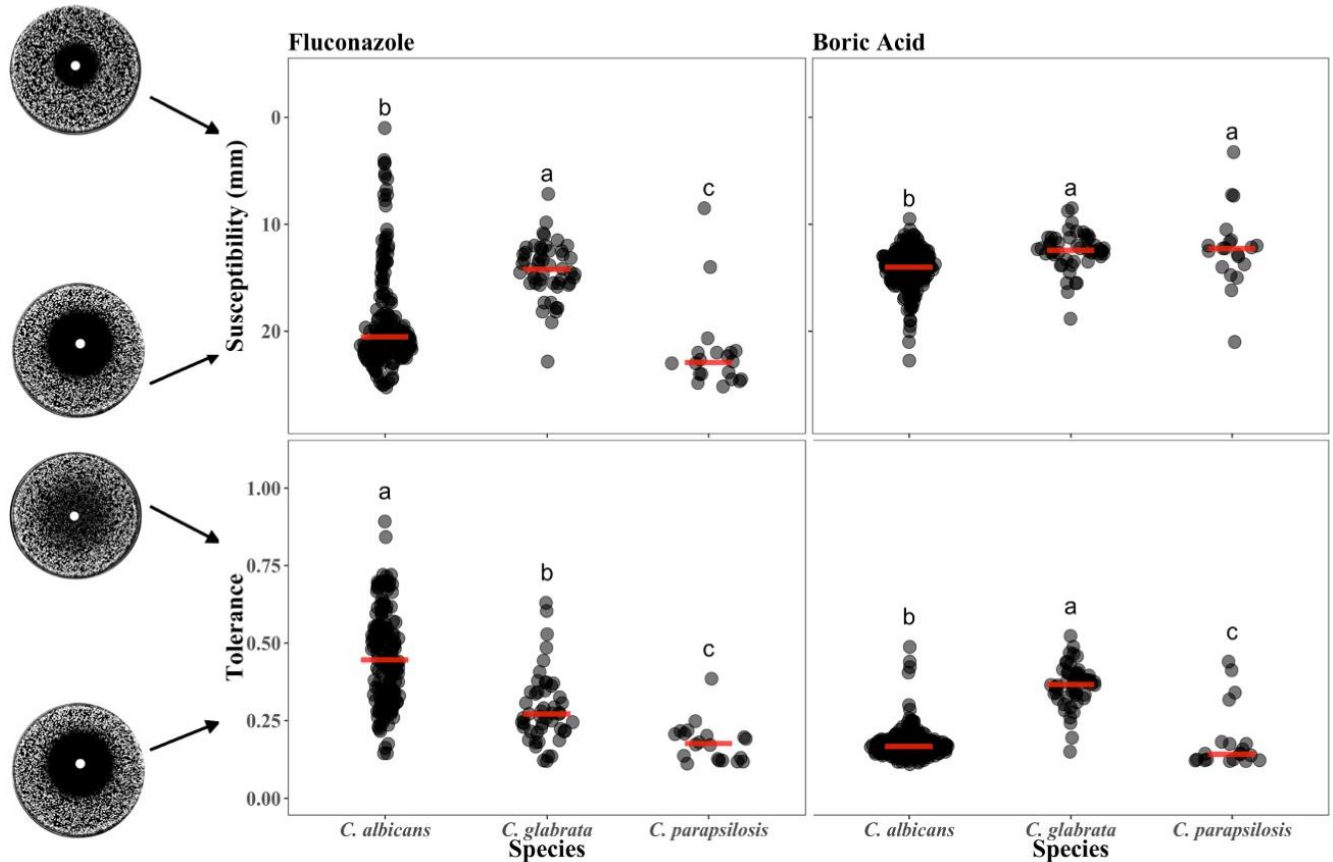

**Figure 1** Susceptibility and tolerance for FLC and BA was quantified for 165 *C. albicans*, 50 *C. glabrata*, and 20 *C. parapsilosis* isolates. Note that susceptibility is measured as RAD<sub>20</sub> and the y-axis is reversed so that the less susceptible (more resistant) isolates are towards the top. Tolerance is measured FoG<sub>20</sub> from *diskImageR* analysis. Letters indicate the statistical differences among-species in each panel from a post-hoc pairwise Wilcox test with the Benjamini and Hochberg (1995) p-value adjustment; when species do not share a letter, they are significantly different from each other ( $P < 0.05$ ).

104

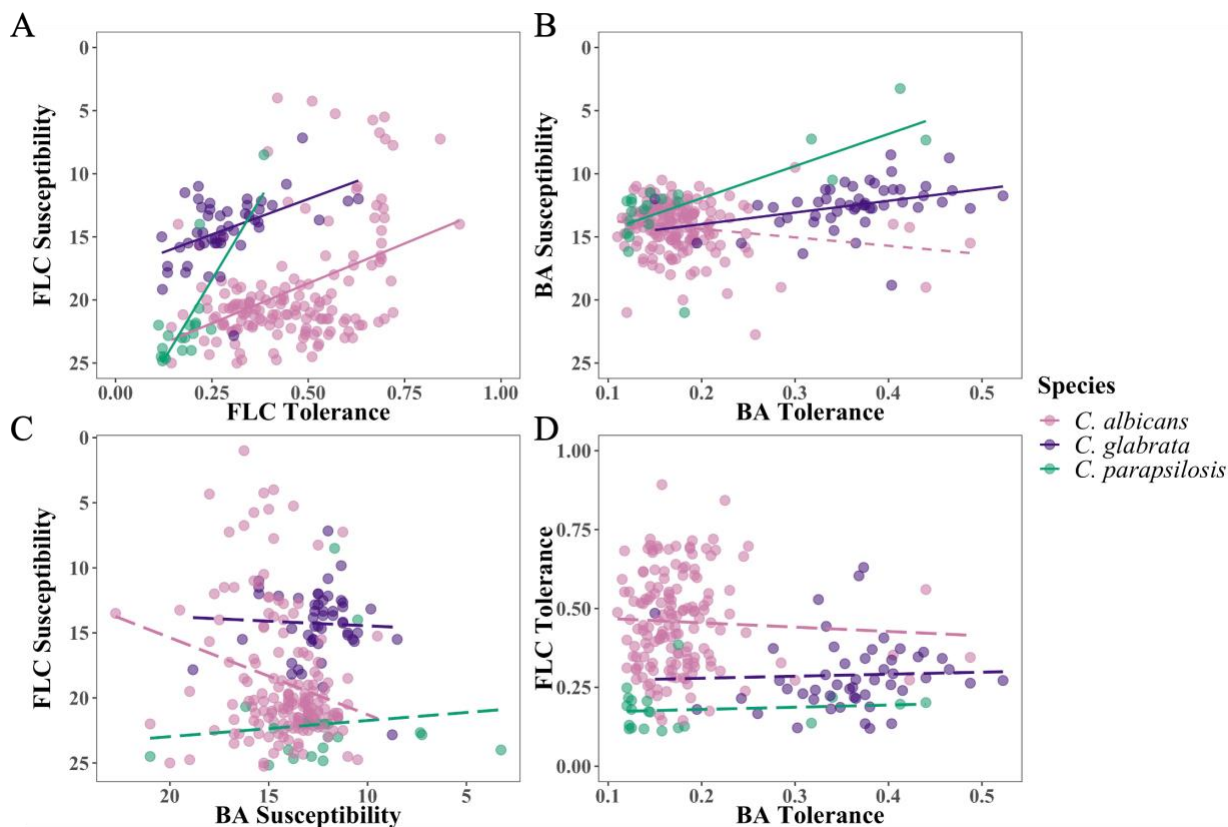

105

**Figure 2** Association within and between drug response parameter and drugs. (A) susceptibility and tolerance in FLC, (B) susceptibility and tolerance in BA, (C) susceptibility in FLC and BA, (D) tolerance in FLC and BA. Solid lines indicate a significant correlation ( $P < 0.05$ ) from a Spearman's rank correlation test.

106

### 107 **BA Inhibits *C. albicans* Hyphal Formation**

108 We used time-lapse microscopy to examine the ability of eight phylogenetically diverse *C.*  
109 *albicans* isolates to form hyphae and begin biofilm formation in the presence of drug (Figure 3).  
110 Visual inspection of images indicated it took only 1-2 hours for all isolates to form hyphae  
111 regardless of the FLC concentration (Figure 3B). By contrast, BA affected hyphal formation in a  
112 highly dose-dependent manner. In low levels of BA (0.4 and 0.8 mg/mL), there was very little  
113 variation in the time to first hyphal formation among isolates. As the level of BA increased, the  
114 time to hyphal formation as well as the variation among isolates increased. No hyphae were  
115 observed by 24 h at the highest level of BA.

116 To further quantify biofilm formation from the time-lapse images, we used a computational  
117 pipeline that we recently developed that uses machine learning in the Orbit Image Analysis  
118 program (29) and custom R scripts. The pipeline computationally quantifies the percent area  
119 covered by cells in each image, and uses this to calculate the biofilm growth rate, the time to reach  
120 the growth asymptote (i.e., growth plateau), and percent area covered at the asymptote. At the  
121 highest FLC concentration, populations retained 50-100 % of percent area covered by cells at the  
122 asymptote relative to no drug (Figure 4A) and had a reduced but still relatively high growth rate  
123 (Figure 4B). There was not a clear trend among isolates in the time required to reach the asymptote  
124 (Figure 4C). Consistent with the identified variation by eye in the time to hyphal formation, BA  
125 reduced the percent area covered by cells at the growth asymptote, decreased the growth rate and  
126 increased the time to reach the growth asymptote in a dose-dependent manner (Figure 4A-C).  
127 Interestingly, there was more variation in percent area at the growth asymptote, growth rate, and  
128 time to reach the growth asymptote among isolates in FLC compared to BA. There was no  
129 correlation between FLC drug responses and BA drug responses (Spearman's rank correlation,  
130 percent area covered by cells:  $S = 1399899$ ,  $P = 0.48$ ; time to reach the growth asymptote  $S =$   
131  $1346887$ ,  $P = 0.89$ ; growth rate:  $S = 1275866$ ,  $P = 0.5447$ ). Overall, unlike FLC, BA effectively  
132 inhibits hyphal formation and biofilm formation in a dose-dependent manner.



133

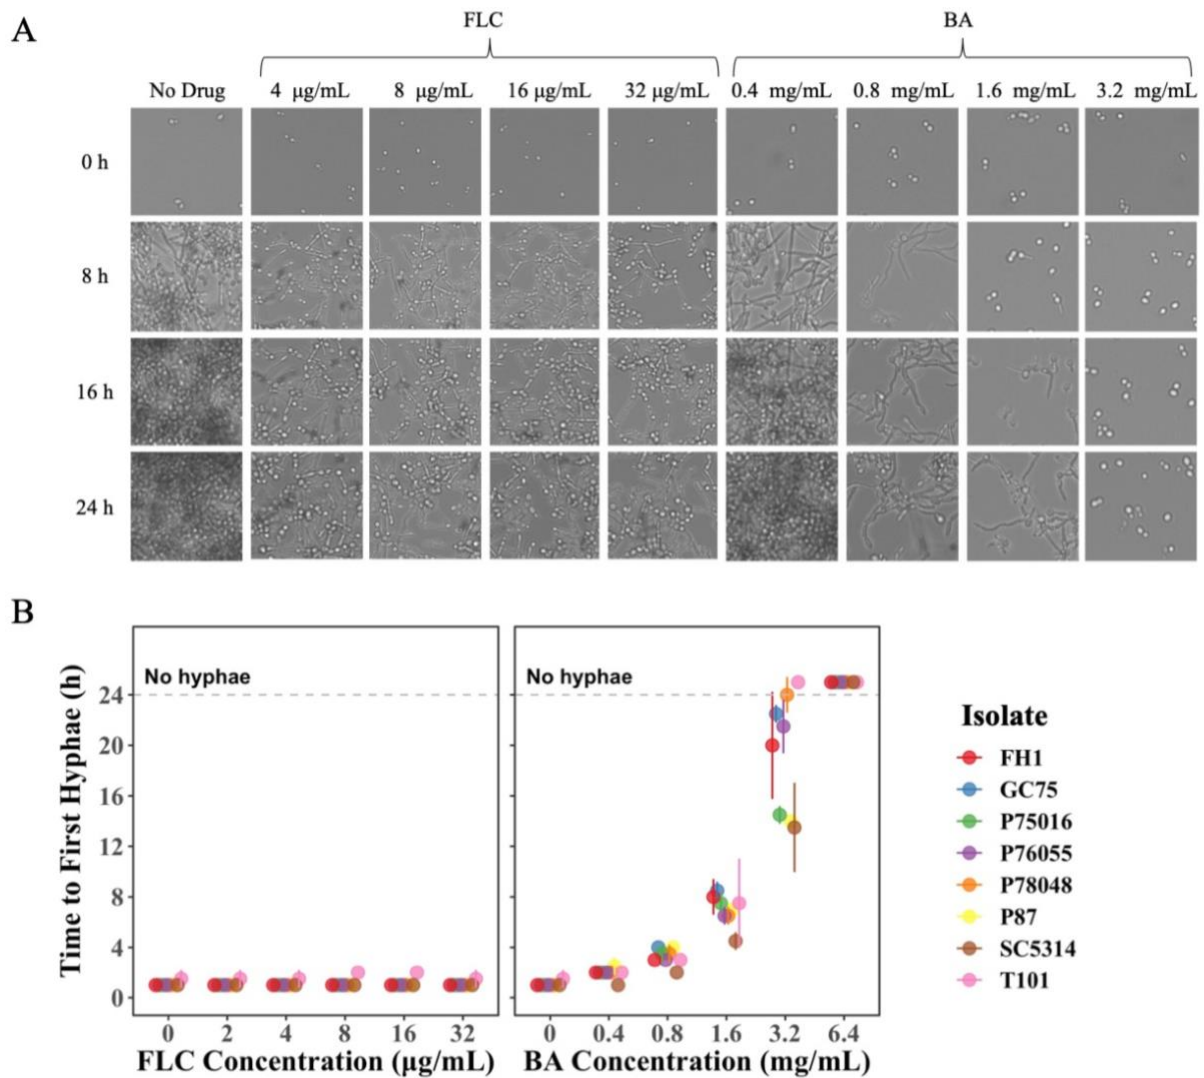

**Figure 3** Biofilm formation drug responses of eight *C. albicans* isolates. Fungal cells were initially cultured in liquid YPD at 30 °C, washed and standardized to OD<sub>600</sub> of 0.01 in RPMI. Cells were inoculated into various concentrations of FLC or BA. The plate was incubated at 37 °C and (A) manually taken out every 1 h for 24 h for scan using Evos FL Auto 2 inverted microscopy. (B) Time to the first hyphal formation was measured by manually going through the images and identifying the hour where the first hypha was observed. Values presented for each isolate are the mean of two biological replicates ± SD.

134



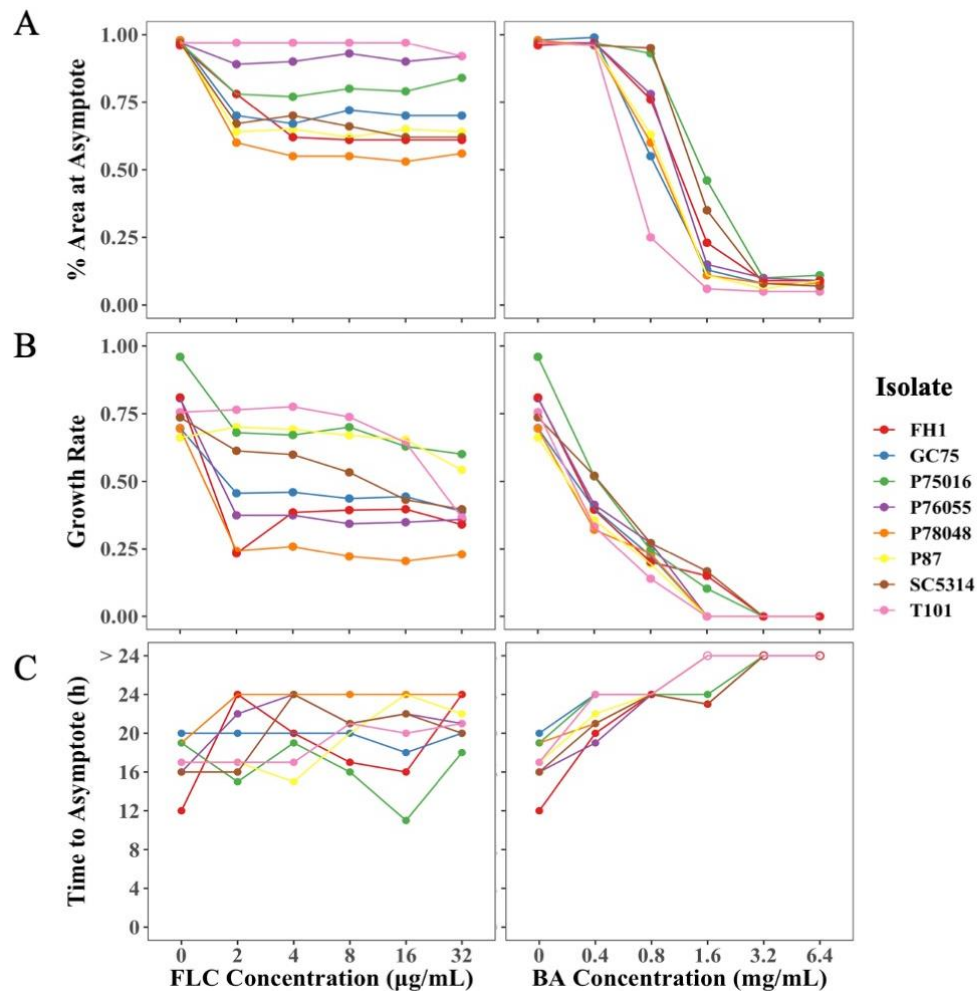

**Figure 4** Quantitative image analysis of time lapse images of eight *C. albicans* isolates. Orbit Image Analysis was used to calculate the % area covered by cells for all the images and custom R scripts was used to calculate % area at the asymptote, growth rate and time to reach the asymptote. BA affected biofilm formation in a dose dependent manner; (A) it reduced % area at the asymptote, (B) decreased the growth rate, and (C) increased time to reach the asymptote unlike FLC. Values presented are the mean of two biological replicates.

135

### 136 **BA Eradicates *C. albicans* Mature Biofilms**

137 The ability of drugs to break apart mature *C. albicans* biofilms formed in absence of drug  
138 was evaluated by quantifying both biomass and activity. As previously shown by others (24, 30,  
139 31), mature biofilms were largely impervious to FLC; post-drug biomass was higher than the  
140 measured pre-drug biomass for all levels of FLC (Figure 5; linear mixed-effect model implemented  
141 in the lmer R package (32), with change in biomass as the response variable, level of the drug as  
142 the predictor and isolate as a random effect, p-value obtained through the analysis of variance test  
143 with Satterthwaite's method for degrees of freedom;  $F_{1,342} = 2.98$ ,  $P = 0.09$ ). There was a negative

144 association between FLC concentration and biofilm activity (linear mixed-effect model with  
145 change in activity as the response variable, level of the drug as the predictor, and isolate as a  
146 random effect,  $F_{1,342} = 32.46$ ,  $P < 0.0001$ ), driven by activity at the highest level of FLC (model  
147 with FLC 32  $\mu\text{g}/\text{mL}$  removed from the dataset:  $F_{1,285} = 0.0937$ ,  $P = 0.76$ ).

148 Similar to biofilm formation, BA significantly affected biofilm biomass and activity in a  
149 dose-dependent manner (Figure 5; biomass,  $F_{6,342} = 249.94$ ,  $P < 0.0001$ ; activity,  $F_{6,342} = 249.94$ ,  
150  $P < 0.0001$ ). Interestingly, the biomass of 48% of isolates and the activity of 57% of isolates  
151 increased at 0.4 mg/mL BA relative to no drug, suggesting that BA can stimulate growth at a low  
152 concentration. The biofilm biomass at high BA concentrations relative to a biofilm grown without  
153 drug was reduced for all isolates. The activity of the remaining biofilm at the highest BA levels  
154 for some isolates increased above that of the preceding lower drug level, likely because BA  
155 degraded the biofilm matrix allowing XTT to better penetrate the cells.

156 Planktonic drug responses were partially predictive of biofilm responses, albeit in an  
157 inconsistent manner. Isolates with higher planktonic growth tended to have a higher biofilm  
158 activity but not higher biomass, while lower susceptibility (higher resistance) did not predict either  
159 biofilm biomass or activity (Supplementary Materials Figure 1-4; linear mixed-effect model with  
160 the FLC planktonic response as the predictor variables and isolate as a random effect; change in  
161 biomass as the response variable: susceptibility,  $F_{1,57} = 1.59$ ,  $P = 0.21$ , tolerance,  $F_{1,54} = 1.28$ ,  $P =$   
162  $0.26$ ; change in activity as the response variable, susceptibility,  $F_{1,57} = 2.51$ ,  $P = 0.12$ , tolerance,  
163  $F_{1,54} = 5.76$ ,  $P = 0.02$ ). By contrast, reduced BA planktonic susceptibility was associated with  
164 higher biofilm activity but not biomass, while tolerance was associated with neither (susceptibility,  
165 change in biomass,  $F_{1,57} = 1.04$ ,  $P = 0.31$ , change in activity,  $F_{1,57} = 5.55$ ,  $P = 0.02$ ; tolerance,  
166 change in biomass,  $F_{1,57} = 0.0004$ ,  $P = 0.98$ ; change in activity,  $F_{1,57} = 0.07$ ,  $P = 0.79$ ). Hence,  
167 isolate differences in planktonic drug responses are likely not a good predictor for how a specific  
168 isolate will respond to drug when in a biofilm.

169

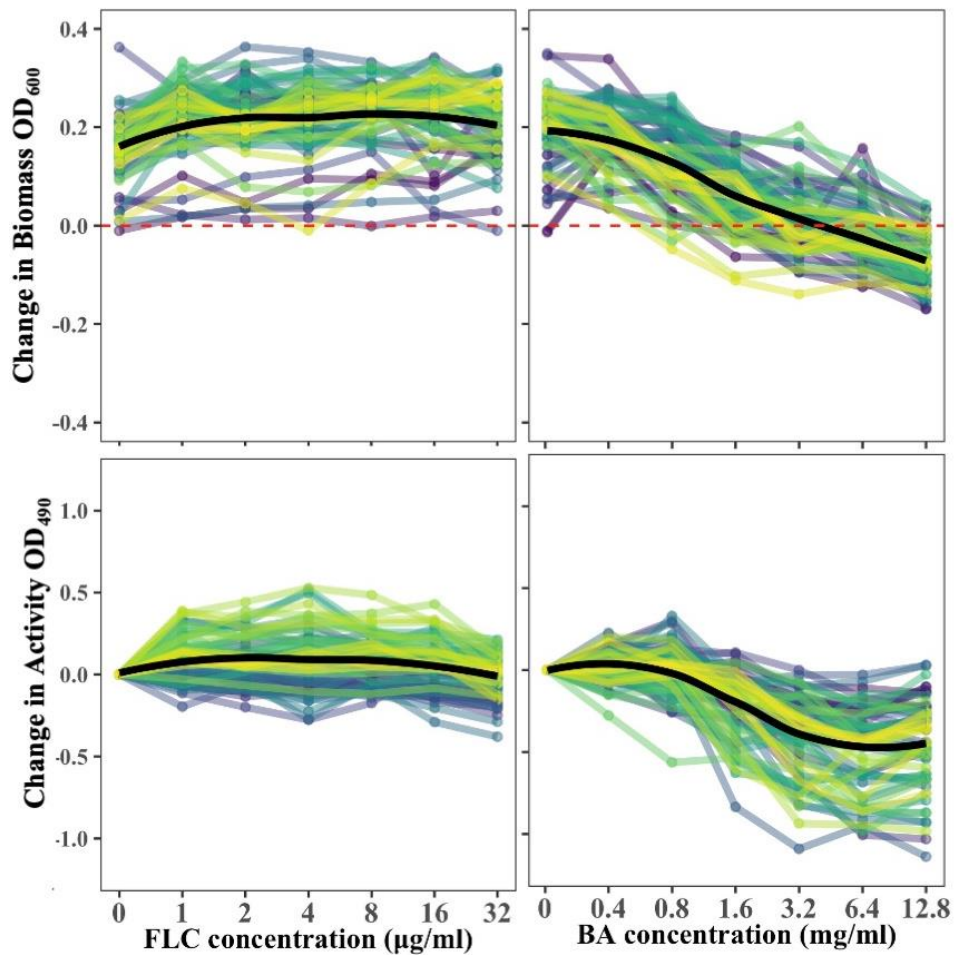

**Figure 5** Biofilms drug responses of 63 *C. albicans* isolates. In all panels, the black line indicates the mean across all isolates at each concentration. The line colors are arbitrary and used to visualize different isolates. Biofilms were insensitive to FLC regardless of the FLC concentration. BA eradicated mature biofilms in a dose-dependent manner and reduced activity. Values presented are the means of three biological replicates.

170

171

## 172 Discussion

173 We screened isolates of *Candida* species to enhance our understanding of how diverse  
174 isolates in multiple morphologies respond to boric acid (BA), an effective drug for treating  
175 complicated vulvovaginal candidiasis (VVC). We directly compared responses against  
176 fluconazole (FLC), the first-line treatment. Consistent with previous work, compared to *C.*  
177 *albicans*, we found that *C. glabrata* on average had lower susceptibility to both FLC (33, 34) and  
178 BA (13, 14). Our work is also in agreement with previous work that found no correlation between  
179 FLC and BA susceptibility in 76 *C. albicans* isolates (27), implying that the mode of action of FLC  
180 is different from that of BA. In both *C. albicans* and *C. glabrata*, we found that the distribution of  
181 susceptibility values was broader in FLC than BA. Rosenberg *et al.* (2018) measured  
182 susceptibility in 19 *C. albicans* isolates in seven antifungal drugs and similarly found FLC had the  
183 broadest distribution (16). Our work suggests BA resistant isolates may be rare as only one *C.*  
184 *parapsilosis* isolate out of 235 *C. albicans*, *C. glabrata* and *C. parapsilosis* isolates had  
185 considerably higher resistance than other isolates. Additional screening with a larger isolate  
186 collection is required to establish clinical breakpoints of BA resistance.

187 We also found significant variation among species and a wider breadth of responses in FLC  
188 compared to BA for drug tolerance. There is a growing acknowledgment that fungal drug tolerance  
189 may be associated with treatment failure and infection persistence. One study showed that *C.*  
190 *albicans* isolates from patients with persistent candidemia had a higher tolerance to FLC than  
191 isolates from patients with non-persistent candidemia (16). Increased tolerance was also found to  
192 be a good predictor of FLC efficiency in patients with *C. albicans* bloodstream infections (18).

193 Interestingly, using the CLSI disk diffusion assay protocol (35), we found that FLC drug  
194 susceptibility and tolerance were significantly correlated for all three species, while BA drug  
195 susceptibility and tolerance were significantly correlated for *C. glabrata* and *C. parapsilosis*. This  
196 result differs from a previous screen of 219 *C. albicans* isolates that found no correlation between  
197 FLC susceptibility and tolerance when isolates were grown up on YPD and tested on casitone  
198 plates at 30 °C (16). Although the mechanisms of tolerance have not yet been well resolved, assay  
199 medium and temperature has previously been shown to significantly influence fungal drug  
200 susceptibility and can dramatically affect drug tolerance (15). The drivers and clinical importance  
201 of tolerance is an area of active interest and research.

202           The involvement of morphological changes in symptomatic vulvovaginal candidiasis is  
203 also an area of current interest. Hyphal formation is an important virulence trait in many infection  
204 contexts, and compounds that inhibit hyphal formation in *C. albicans* significantly reduce  
205 virulence in multiple contexts (36, 37). Our results show that *C. albicans* forms hyphae in the first  
206 2 h regardless of FLC concentration, in alignment with previous research (26). Through the new  
207 quantitative platform we developed, we similarly found that percent area covered at the asymptote,  
208 biofilm growth rate, and time to reach the growth asymptote are also not correlated with FLC  
209 concentration, though we did uncover significant variation among isolates for these phenotypes.  
210 BA is clearly superior to FLC at the inhibition of hyphal formation, with the speed of  
211 morphological transition and subsequent biofilm formation influenced by BA in a dose-dependent  
212 manner. Hyphal formation was previously reported before to be responsible for vaginal  
213 inflammation (38, 39), and hyphae contribute to the invasive growth of *C. albicans* (20),  
214 suggesting that inhibiting the yeast to hyphal transition could help explain why BA is an effective  
215 treatment against complicated VVC.

216           If a biofilm has formed in the absence of a drug (e.g., prior to a symptomatic infection),  
217 penetration of drugs through the extracellular matrix is critical for eradication (40). We found that  
218 *C. albicans* biofilms are insensitive to FLC, consistent with past work (30, 31). Conversely, we  
219 found that BA can reduce biomass and activity of mature biofilms in a dose-dependent manner,  
220 and therefore is likely capable of penetration. Approximately 40% of the extracellular matrix of  
221 *C. albicans* is composed of polysaccharides and the major carbohydrates present is glucose (~40%)  
222 (22, 41). Saccharides (especially glucose) have a strong affinity for borate (42), thus we think that  
223 BA likely penetrates the extracellular matrix of the biofilm by breaking the matrix apart. Compared  
224 to planktonic cells, *C. albicans* cells in a biofilm have a significantly higher  $\beta$ -1,3 glucan content  
225 in their cell wall, which has been implicated in FLC impermeability (43). We observed an increase  
226 in activity at high BA concentrations even though the biomass was decreasing. We think that this  
227 increase in activity is artificial and due to how the XTT activity assay works. Mitochondrial  
228 succinoxidase, cytochrome P450 systems, and flavoprotein oxidases convert XTT to a colored  
229 formazan (44). If high concentrations of BA degrade the extracellular matrix, then more XTT will  
230 get inside the cells, which is read out as increase in activity. Our future work will thus directly  
231 investigate the ability of BA to penetrate the cell wall of different *Candida* morphologies.

232

233 **Conclusion**

234           Our work provides baseline data for multiple ways boric acid is an effective drug against  
235 diverse isolates of *Candida* species. We find that planktonic susceptibility and tolerance are more  
236 similar among isolates in boric acid than fluconazole. Boric acid is also effective at slowing or  
237 stopping the yeast-to-hyphal transition and biofilm growth in *C. albicans*, as well as able to  
238 penetrate and degrade mature biofilms. Planktonic responses in fluconazole and boric acid were  
239 not correlated, and nor did planktonic and biofilm phenotypes. Combined, this work advances our  
240 understanding of multiple biological fronts about why boric acid may be an effective treatment  
241 against vulvovaginal candidiasis.

242



## 243 **Material and Methods**

### 244 **Isolates**

245           235 *Candida* spp. isolates were used in this study (Supporting Materials Table 1). 155 of  
246 these isolates (85 *C. albicans*, 50 *C. glabrata*, and 20 *C. parapsilosis*) were provided by the clinical  
247 microbiology lab in the Health Sciences Centre (HSC) in Winnipeg, Canada. 80 additional *C.*  
248 *albicans* isolates that have previously been published from our lab freezer inventory were also  
249 examined.

250

### 251 **Disk Diffusion Assay**

252           To screen for drug susceptibility and tolerance, the CLSI document M44 guidelines for  
253 antifungal disk diffusion susceptibility testing were followed with slight modifications (35).  
254 Briefly, isolates were streaked from frozen glycerol stocks into Sabouraud Dextrose Agar (SDA)  
255 and incubated for 48 h at 37 °C. Colonies were resuspended in 200 µL of PBS and were  
256 standardized to an optical density (OD<sub>600</sub>) of 0.01 in 1 mL PBS. 100 µL of the standardized cells  
257 were spread in duplicates onto 15 mL Muller Hinton (MH) plates using sterile beads. 5 mg BA  
258 disks were prepared by transferring 10 µL of preheated 500 mg/mL BA in Dimethyl sulfoxide  
259 (DMSO) stock to blank antimicrobial disks (6 mm, Fisher Scientific). Single disks containing  
260 either 5 mg BA or 25 µg FLC (6 mm, Fisher Scientific) were placed in the center of the MH plates.  
261 Plates were then incubated at 37 °C for 48 h, and individual photographs were taken of each plate  
262 every 24 h and 48 h. Images were edited using ImageJ (45) according to recommendations  
263 specified in diskImageR vignette V2 146 (46). Disk diffusion analysis to measure drug  
264 susceptibility and drug tolerance was done using diskImageR package and the R script available  
265 at <https://github.com/acgerstein/diskImageR/blob/master/inst/walkthrough.R> (15). Susceptibility  
266 was measured from 48 h images as RAD<sub>20</sub> (the radius where 20% growth of reduction occurs)  
267 while tolerance was measured as FoG<sub>20</sub> (the fraction of growth above RAD<sub>20</sub>).

268

### 269 **Boric Acid levels**

270           We picked the concentrations of BA based by measuring the minimum inhibitory  
271 concentration (MIC) for the isolates used in biofilm formation and eradication was determined  
272 using the CLSI M27-A2 guidelines with some modifications. Briefly, isolates used in biofilm



273 formation and biofilm eradication screening were streaked from frozen stocks on SDA plates and  
274 were incubated overnight at 37 °C. Colonies were suspended in PBS and were standardized to an  
275 OD<sub>600</sub> of 0.01 in 1 mL of RPMI-1640. 100 µL of the standardized culture were transferred to a 96-  
276 well plate (Greiner Bio-One) containing two-fold dilutions of BA with the maximum concentration  
277 of 50 mg/mL (maximum solubility of BA in RPMI) in column 1, column 11 containing no drug  
278 and column 12 containing just RPMI-1640. MIC<sub>50</sub> were determined by taking OD<sub>600</sub> after 24h and  
279 48h. The MIC<sub>50</sub> of all isolates was either 0.39 or 0.78 mg/mL and the MIC was 1.56 mg/mL. We  
280 decided to pick two levels above and below the MIC and to round the concentrations to one  
281 decimal place (i.e., 0.4, 0.8, 1.6, 3.2 and 6.4 mg/mL).

282

### 283 **Biofilm Formation Drug Response**

284 The ability to form a biofilm in the presence of a drug of eight *C. albicans* isolates was  
285 measured as previously described in (47). Briefly, 100 µL of RPMI-1640 was added to all the wells  
286 of columns 1-9 and 12 of a flat-bottom 96-well microtiter plate (Greiner Bio-One). 200 µL of  
287 RPMI-1640 + 12.8 mg/mL BA was added to all wells of column 11 and 200 µL of RPMI-1640 +  
288 64 µg/mL FLC was added to all wells of column 10. A 2 fold serial dilution for each drug was  
289 done so that odd-numbered columns (11-3) contain dilutions of BA, even-numbered columns (10-  
290 2) contain dilutions of FLC, and columns 1 and 12 contain no drug. *Candida albicans* isolates  
291 SC5314 (ATCC MYA-2876), FH1 (48), P87 (49), GC75 (49), P78048 (49), P75016 (49), P76055  
292 (49) and T101 (50) isolates were grown overnight 30 °C in liquid YPD from frozen glycerol stocks.  
293 These isolates were picked because they span the phylogenetic diversity of *C. albicans*. Overnight  
294 cultures were washed with PBS and standardized to OD<sub>600</sub> of 0.005 in 1.5 mL RPMI-1640. 100 µL  
295 of the standardized cultures were inoculated into the 96-well microtiter plate that contains our  
296 drugs. The plate was sealed with a clear seal (Thermo Scientific) and polystyrene microplate lid  
297 (Greiner Bio-One), and parafilm was used to seal the sides of the plate. The plate was incubated  
298 at 37 °C and images were taken manually every 1 h for 24 h using Evos FL Auto 2 inverted  
299 microscopy (Thermo Scientific).

300

### 301 **Microscopic Image Analysis**

302 Time to form hyphae was recorded manually by going through the images and taking note  
303 of the time of the first hypha that was observed. Important parameters (% area at the asymptote,

304 growth rate, time to reach the asymptote) that correlate with biofilm formation ability were  
305 extracted using a high throughput automated method (47). Briefly, Orbit Image Analysis (29) was  
306 trained on 14 images and a detection model with 99.3% correctly classified instances was created.  
307 This detection model was used to calculate the % area covered by cells for all of the images.  
308 Custom R scripts (47) were used to extract % area at the asymptote, growth rate, time to reach the  
309 asymptote from Orbit output.

310

### 311 **Biofilm Eradication**

312 Biofilms were prepared as described previously with slight modifications (51). Briefly,  
313 overnight cultures of 68 different *C. albicans* isolates were prepared by inoculating 10  $\mu$ L of frozen  
314 glycerol stocks in 500  $\mu$ L YPD (Yeast Peptone Dextrose) liquid medium in a microplate shaker  
315 (about 200 rpm) at 30 °C overnight. Isolates were then standardized to OD<sub>600</sub> of 0.01 in 1.5 mL  
316 RPMI-1640 broth and aliquots of 100  $\mu$ L of the standardized culture were inoculated into flat-  
317 bottom 96-well microtiter plates (Fisher Scientific). The plates were then covered with a sealing  
318 membrane, sterilized lids, and the sides of the plates were sealed with parafilm. The plates were  
319 incubated statically at 37 °C for 24h. Mature biofilms were washed 3 times with phosphate buffer  
320 saline (PBS) to remove the non-adherent cells, and OD<sub>600</sub> was taken to quantify the pre-drug  
321 biomass of the biofilms.

322 The examined drug concentrations ranged from 0.4 mg/mL to 12.8 mg/mL for BA and  
323 from 1  $\mu$ g/mL to 32 $\mu$ g/mL for FLC. The biofilm antifungal susceptibility testing was done  
324 according to (51) with slight modifications. Briefly, the mature biofilms were treated with either  
325 BA or FLC and incubated statically with the drug for 24 h at 37 °C. The drug-treated biofilms were  
326 washed 3 times with PBS, and OD<sub>600</sub> was taken to quantify the post-drug biomass of the biofilms.  
327 The biomass of the biofilms was normalized by subtracting the biomass of the biofilms pre-drug  
328 exposure from the biomass of the biofilms at each concentration. The metabolic activity was  
329 determined using the calorimetric 2,3-Bis-(2-Methoxy-4-Nitro-5-Sulfophenyl)-2H-Tetrazolium-  
330 5-Carboxanilide (XTT) assay, which measures mitochondria reduction of the tetrazolium salt  
331 reagent; briefly, mature biofilms were incubated with 100  $\mu$ L of XTT for 2 h in 37 °C, and OD<sub>490</sub>  
332 was taken to quantify the metabolic activity. Biofilm activity was normalized by subtracting the  
333 activity at no drug concentration from the activity at each drug concentration. We excluded 4

334 isolates from our analysis because they failed to form biofilms during the pre-drug exposure  
335 phase.

### 336 **Statistical Analysis**

337 Values for susceptibility and tolerance screening represent the average of three biological  
338 replicates with one or more technical replicates each. Values for hyphal and biofilm formation  
339 represent the average of two biological replicates with one technical replicate each. Values for  
340 biofilm eradication represent the average of three biological replicates with one technical replicate  
341 each. Error bars throughout represent standard error.

342 All statistical tests performed and graphs generated were done using R programming  
343 language (52). Since our data is not normally distributed, we used rank-based measures. When  
344 comparing susceptibility and tolerance among species for each drug, we used Kruska-Wallis rank-  
345 sum test and determined significance using post-hoc pairwise Wilcoxon tests with the (Benjamini  
346 and Hochberg, 1995)  $P$ . We looked at homogeneity of group variances using Flinger-Killeen test  
347 of homogeneity. We used Spearman's rank correlation when looking at the correlation between  
348 planktonic drug responses. We used linear mixed-effect models from lmerTest R package (32) to  
349 determine if planktonic drug responses would influence biofilm drug responses. In all cases, the  
350 specific statistical test is indicated inline. Significance was assigned for  $P < 0.05$ . Raw data and  
351 scripts to generate figures and statistical analyses are available at  
352 [https:// https://github.com/acgerstein/BAFLC\\_Phenotypic](https://github.com/acgerstein/BAFLC_Phenotypic)

353 **Acknowledgements**

354 We thank Dr. Markus Stein at the Health Sciences Centre in Winnipeg for providing isolates from  
355 the clinical microbiology lab, as well as Drs. Judith Berman, Ted White, Donna MacCallum,  
356 Dominique Sanglard, Peter Magee, Shawn Lockhart, Claude Pujol, David Soll for sharing strains  
357 with the Candida community. We are grateful to Dr. Vanessa Poliquin for her critical insight and  
358 thoughtful conversations about her experience treating women with complicated vulvovaginal  
359 candidiasis. We thank R. Kukurudz and K. Chokkar for laboratory assistance, and S. Harris, P.  
360 Pelka, S. Cardona and A. Kumar for use of equipment.

361

362

363 **References**

- 364 1. Sobel JD, Faro S, Force RW, Foxman B, Ledger WJ, Nyirjesy PR, Reed BD, Summers PR.  
365 1998. Vulvovaginal candidiasis: epidemiologic, diagnostic, and therapeutic considerations.  
366 *Am J Obstet Gynecol* 178:203–211.
- 367 2. Sobel JD. 2007. Vulvovaginal candidosis. *Lancet* 369:1961–1971.
- 368 3. van Schalkwyk J, Yudin MH, INFECTIOUS DISEASE COMMITTEE. 2015.  
369 Vulvovaginitis: screening for and management of trichomoniasis, vulvovaginal candidiasis,  
370 and bacterial vaginosis. *J Obstet Gynaecol Can* 37:266–274.
- 371 4. Pappas PG, Kauffman CA, Andes DR, Clancy CJ, Marr KA, Ostrosky-Zeichner L, Reboli  
372 AC, Schuster MG, Vazquez JA, Walsh TJ, Zaoutis TE, Sobel JD. 2016. Clinical Practice  
373 Guideline for the Management of Candidiasis: 2016 Update by the Infectious Diseases  
374 Society of America. *Clin Infect Dis* 62:e1-50.
- 375 5. Denning DW, Kneale M, Sobel JD, Rautemaa-Richardson R. 2018. Global burden of  
376 recurrent vulvovaginal candidiasis: a systematic review. *Lancet Infect Dis* 18:e339–e347.
- 377 6. Linhares LM, Witkin SS, Miranda SD, Fonseca AM, Pinotti JA, Ledger WJ. 2001.  
378 Differentiation between women with vulvovaginal symptoms who are positive or negative  
379 for *Candida* species by culture. *Infect Dis Obstet Gynecol* 9:221–225.
- 380 7. Cetin M, Ocak S, Gungoren A, Hakverdi AU. 2007. Distribution of *Candida* species in  
381 women with vulvovaginal symptoms and their association with different ages and  
382 contraceptive methods. *Scand J Infect Dis* 39:584–588.

- 383 8. Okungbowa FI, Isikhuemhen OS, Dede APO. 2003. The distribution frequency of *Candida*  
384 species in the genitourinary tract among symptomatic individuals in Nigerian cities. *Rev*  
385 *Iberoam Micol* 20:60–63.
- 386 9. Kidd SE, Halliday CL, McMullan B, Chen SC-A, Elvy J. 2021. New names for fungi of  
387 medical importance: Can we have our cake and eat it too? *J Clin Microbiol*. American Society  
388 for Microbiology.
- 389 10. Sobel JD, Chaim W, Nagappan V, Leaman D. 2003. Treatment of vaginitis caused by  
390 *Candida glabrata*: use of topical boric acid and flucytosine. *Am J Obstet Gynecol* 189:1297–  
391 1300.
- 392 11. Iavazzo C, Gkegkes ID, Zarkada IM, Falagas ME. 2011. Boric acid for recurrent vulvovaginal  
393 candidiasis: the clinical evidence. *J Womens Health* 20:1245–1255.
- 394 12. Prutting SM, Cerveny JD. 1998. Boric acid vaginal suppositories: a brief review. *Infect Dis*  
395 *Obstet Gynecol* 6:191–194.
- 396 13. De Seta F, Schmidt M, Vu B, Essmann M, Larsen B. 2009. Antifungal mechanisms  
397 supporting boric acid therapy of *Candida* vaginitis. *J Antimicrob Chemother* 63:325–336.
- 398 14. Otero L, Palacio V, Mendez FJ, Vazquez F. 2002. Boric acid susceptibility testing of non-*C.*  
399 *albicans* *Candida* and *Saccharomyces cerevisiae*: comparison of three methods. *Med Mycol*  
400 40:319–322.

- 401 15. Gerstein AC, Rosenberg A, Hecht I, Berman J. 2016. diskImageR: quantification of resistance  
402 and tolerance to antimicrobial drugs using disk diffusion assays. *Microbiology* 162:1059–  
403 1068.
- 404 16. Rosenberg A, Ene IV, Bibi M, Zakin S, Segal ES, Ziv N, Dahan AM, Colombo AL, Bennett  
405 RJ, Berman J. 2018. Antifungal tolerance is a subpopulation effect distinct from resistance  
406 and is associated with persistent candidemia. *Nat Commun* 9:2470.
- 407 17. Berman J, Krysan DJ. 2020. Drug resistance and tolerance in fungi. *Nat Rev Microbiol*  
408 <https://doi.org/10.1038/s41579-019-0322-2>.
- 409 18. Levinson T, Dahan A, Novikov A, Paran Y, Berman J, Ben-Ami R. 2021. Impact of tolerance  
410 to fluconazole on treatment response in *Candida albicans* bloodstream infection. *Mycoses*  
411 64:78–85.
- 412 19. Noble SM, Gianetti BA, Witchley JN. 2017. *Candida albicans* cell-type switching and  
413 functional plasticity in the mammalian host. *Nat Rev Microbiol* 15:96–108.
- 414 20. Gulati M, Nobile CJ. 2016. *Candida albicans* biofilms: development, regulation, and  
415 molecular mechanisms. *Microbes Infect* 18:310–321.
- 416 21. Wilson D, Naglik JR, Hube B. 2016. The Missing Link between *Candida albicans* Hyphal  
417 Morphogenesis and Host Cell Damage. *PLoS Pathog* 12:e1005867.
- 418 22. Cavalheiro M, Teixeira MC. 2018. *Candida* Biofilms: Threats, Challenges, and Promising  
419 Strategies. *Front Med* 5:28.



- 420 23. Harriott MM, Lilly EA, Rodriguez TE, Fidel PL, Noverr MC. 2010. *Candida albicans* forms  
421 biofilms on the vaginal mucosa. *Microbiology* 156:3635–3644.
- 422 24. Wu X, Zhang S, Li H, Shen L, Dong C, Sun Y, Chen H, Xu B, Zhuang W, Deighton M, Qu  
423 Y. 2020. Biofilm Formation of *Candida albicans* Facilitates Fungal Infiltration and Persister  
424 Cell Formation in Vaginal Candidiasis. *Front Microbiol* 11:1117.
- 425 25. McKloud E, Delaney C, Sherry L, Kean R, Williams S, Metcalfe R, Thomas R, Richardson  
426 R, Gerasimidis K, Nile CJ, Williams C, Ramage G. 2021. Recurrent Vulvovaginal  
427 Candidiasis: a Dynamic Interkingdom Biofilm Disease of *Candida* and *Lactobacillus*.  
428 *mSystems* 6:e0062221.
- 429 26. Ha KC, White TC. 1999. Effects of azole antifungal drugs on the transition from yeast cells  
430 to hyphae in susceptible and resistant isolates of the pathogenic yeast *Candida albicans*.  
431 *Antimicrob Agents Chemother* 43:763–768.
- 432 27. Pointer BR, Boyer MP, Schmidt M. 2015. Boric acid destabilizes the hyphal cytoskeleton and  
433 inhibits invasive growth of *Candida albicans*. *Yeast* 32:389–398.
- 434 28. Benjamini Y, Hochberg Y. 1995. Controlling the false discovery rate: A practical and  
435 powerful approach to multiple testing. *J R Stat Soc* 57:289–300.
- 436 29. Stritt M, Stalder AK, Vezzali E. 2020. Orbit Image Analysis: An open-source whole slide  
437 image analysis tool. *PLoS Comput Biol* 16:e1007313.

- 438 30. Melo AS, Bizerra FC, Freymüller E, Arthington-Skaggs BA, Colombo AL. 2011. Biofilm  
439 production and evaluation of antifungal susceptibility amongst clinical *Candida* spp. isolates,  
440 including strains of the *Candida parapsilosis* complex. *Med Mycol* 49:253–262.
- 441 31. Sherry L, Kean R, McKloud E, O'Donnell LE, Metcalfe R, Jones BL, Ramage G. 2017.  
442 Biofilms Formed by Isolates from Recurrent Vulvovaginal Candidiasis Patients Are  
443 Heterogeneous and Insensitive to Fluconazole. *Antimicrob Agents Chemother* 61.
- 444 32. Kuznetsova A, Brockhoff PB, Christensen RHB. 2017. lmerTest Package: Tests in Linear  
445 Mixed Effects Models. *Journal of Statistical Software*.
- 446 33. Bhattacharjee P. 2016. Epidemiology and antifungal susceptibility of *Candida* species in a  
447 tertiary care hospital, Kolkata, India. *Curr Med Mycol* 2:20–27.
- 448 34. Hashemi SE, Shokohi T, Abastabar M, Aslani N, Ghadamzadeh M, Haghani I. 2019. Species  
449 distribution and susceptibility profiles of *Candida* species isolated from vulvovaginal  
450 candidiasis, emergence of *C. lusitaniae*. *Curr Med Mycol* 5:26–34.
- 451 35. Sheehan DJ, Brown SD, Pfaller MA, Warnock DW, Rex JH, Chaturvedi V, Espinel-Ingroff  
452 A, Ghannoum MA, Moore LS, Odds FC, Others. 2004. Method for Antifungal Disk Diffusion  
453 Susceptibility Testing of Yeasts; Approved Guideline. Pennsylvania, USA: National  
454 Committee for Clinical Laboratory Standards M27-A2.
- 455 36. Meng L, Zhao H, Zhao S, Sun X, Zhang M, Deng Y. 2019. Inhibition of Yeast-to-Hypha  
456 Transition and Virulence of *Candida albicans* by 2-Alkylaminoquinoline Derivatives.  
457 *Antimicrob Agents Chemother* 63.

- 458 37. Zhao S, Huang J-J, Sun X, Huang X, Fu S, Yang L, Liu X-W, He F, Deng Y. 2018. (1-  
459 aryloxy-2-hydroxypropyl)-phenylpiperazine derivatives suppress *Candida albicans* virulence  
460 by interfering with morphological transition. *Microb Biotechnol* 11:1080–1089.
- 461 38. Moyes DL, Murciano C, Runglall M, Islam A, Thavaraj S, Naglik JR. 2011. *Candida albicans*  
462 yeast and hyphae are discriminated by MAPK signaling in vaginal epithelial cells. *PLoS One*  
463 6:e26580.
- 464 39. Peters BM, Palmer GE, Nash AK, Lilly EA, Fidel PL Jr, Noverr MC. 2014. Fungal  
465 morphogenetic pathways are required for the hallmark inflammatory response during  
466 *Candida albicans* vaginitis. *Infect Immun* 82:532–543.
- 467 40. Rodríguez-Cerdeira C, Gregorio MC, Molares-Vila A, López-Barcenas A, Fabbrocini G,  
468 Bardhi B, Sinani A, Sánchez-Blanco E, Arenas-Guzmán R, Hernandez-Castro R. 2019.  
469 Biofilms and vulvovaginal candidiasis. *Colloids Surf B Biointerfaces* 174:110–125.
- 470 41. Al-Fattani MA, Douglas LJ. 2006. Biofilm matrix of *Candida albicans* and *Candida tropicalis*:  
471 chemical composition and role in drug resistance. *J Med Microbiol* 55:999–1008.
- 472 42. Peters JA. 2014. Interactions between boric acid derivatives and saccharides in aqueous  
473 media: Structures and stabilities of resulting esters. *Coord Chem Rev* 268:1–22.
- 474 43. Nett J, Lincoln L, Marchillo K, Massey R, Holoyda K, Hoff B, VanHandel M, Andes D.  
475 2007. Putative role of beta-1,3 glucans in *Candida albicans* biofilm resistance. *Antimicrob*  
476 *Agents Chemother* 51:510–520.
- 477 44. Altman FP. 1976. Tetrazolium salts and formazans. *Prog Histochem Cytochem* 9:1–56.

- 478 45. Schneider CA, Rasband WS, Eliceiri KW. 2012. NIH Image to ImageJ: 25 years of image  
479 analysis. *Nat Methods* 9:671–675.
- 480 46. Gerstein A. 2016. diskImageR: A Pipeline to Analyze Resistance and Tolerance from Drug  
481 Disk Diffusion Assays.
- 482 47. Salama OE, Gerstein AC. 2021. High-throughput computational analysis of biofilm  
483 formation from time-lapse microscopy. *Curr Protoc* 1:e194.
- 484 48. Marr KA, White TC, van Burik JA, Bowden RA. 1997. Development of fluconazole  
485 resistance in *Candida albicans* causing disseminated infection in a patient undergoing marrow  
486 transplantation. *Clin Infect Dis* 25:908–910.
- 487 49. Wu W, Lockhart SR, Pujol C, Srikantha T, Soll DR. 2007. Heterozygosity of genes on the  
488 sex chromosome regulates *Candida albicans* virulence. *Mol Microbiol* 64:1587–1604.
- 489 50. Odds FC, Bougnoux M-E, Shaw DJ, Bain JM, Davidson AD, Diogo D, Jacobsen MD,  
490 Lecomte M, Li S-Y, Tavanti A, Maiden MCJ, Gow NAR, d’Enfert C. 2007. Molecular  
491 phylogenetics of *Candida albicans*. *Eukaryot Cell* 6:1041–1052.
- 492 51. Pierce CG, Uppuluri P, Tummala S, Lopez-Ribot JL. 2010. A 96 well microtiter plate-based  
493 method for monitoring formation and antifungal susceptibility testing of *Candida albicans*  
494 biofilms. *J Vis Exp* <https://doi.org/10.3791/2287>.
- 495 52. R Core Team. 2020. R: A Language and Environment for Statistical Computing. R  
496 Foundation for Statistical Computing, Vienna, Austria.

- 497 53. Lockhart SR, Pujol C, Daniels KJ, Miller MG, Johnson AD, Pfaller MA, Soll DR. 2002. In  
498 *Candida albicans*, white-opaque switchers are homozygous for mating type. *Genetics*  
499 162:737–745.
- 500 54. MacCallum DM, Castillo L, Nather K, Munro CA, Brown AJP, Gow NAR, Odds FC. 2009.  
501 Property differences among the four major *Candida albicans* strain clades. *Eukaryot Cell*  
502 8:373–387.
- 503 55. Linares CEB, Giacomelli SR, Altenhofen D, Alves SH, Morsch VM, Schetinger MRC. 2013.  
504 Fluconazole and amphotericin-B resistance are associated with increased catalase and  
505 superoxide dismutase activity in *Candida albicans* and *Candida dubliniensis*. *Rev Soc Bras*  
506 *Med Trop* 46:752–758.
- 507 56. Pérez-Martín J, Uría JA, Johnson AD. 1999. Phenotypic switching in *Candida albicans* is  
508 controlled by a SIR2 gene. *EMBO J* 18:2580–2592.
- 509 57. Sanglard D, Kuchler K, Ischer F, Pagani JL, Monod M, Bille J. 1995. Mechanisms of  
510 resistance to azole antifungal agents in *Candida albicans* isolates from AIDS patients involve  
511 specific multidrug transporters. *Antimicrob Agents Chemother* 39:2378–2386.
- 512 58. White TC, Pfaller MA, Rinaldi MG, Smith J, Redding SW. 1997. Stable azole drug resistance  
513 associated with a substrain of *Candida albicans* from an HIV-infected patient. *Oral Dis* 3  
514 Suppl 1:S102-9.
- 515 59. Chen Y-L, Yu S-J, Huang H-Y, Chang Y-L, Lehman VN, Silao FGS, Bigol UG, Bungay  
516 AAC, Averette A, Heitman J. 2014. Calcineurin controls hyphal growth, virulence, and drug  
517 tolerance of *Candida tropicalis*. *Eukaryot Cell* 13:844–854.

- 518 60. Pujol C, Pfaller M, Soll DR. 2002. Ca3 fingerprinting of *Candida albicans* bloodstream  
519 isolates from the United States, Canada, South America, and Europe reveals a European  
520 clade. *J Clin Microbiol* 40:2729–2740.
- 521 61. Ford CB, Funt JM, Abbey D, Issi L, Guiducci C, Martinez DA, Delorey T, Li BY, White TC,  
522 Cuomo C, Rao RP, Berman J, Thompson DA, Regev A. 2015. The evolution of drug  
523 resistance in clinical isolates of *Candida albicans*. *Elife* 4:e00662.
- 524 62. Cowen LE, Kohn LM, Anderson JB. 2001. Divergence in fitness and evolution of drug  
525 resistance in experimental populations of *Candida albicans*. *J Bacteriol* 183:2971–2978.
- 526

527 **Supplementary Materials**

528 **Table 1: List of Isolates Used**

| Strain | Species                | Reference  |
|--------|------------------------|------------|
| HSC001 | <i>C. parapsilosis</i> | This Study |
| HSC001 | <i>C. parapsilosis</i> | This Study |
| HSC002 | <i>C. albicans</i>     | This Study |
| HSC002 | <i>C. albicans</i>     | This Study |
| HSC003 | <i>C. glabrata</i>     | This Study |
| HSC003 | <i>C. glabrata</i>     | This Study |
| HSC005 | <i>C. glabrata</i>     | This Study |
| HSC005 | <i>C. glabrata</i>     | This Study |
| HSC006 | <i>C. tropicalis</i>   | This Study |
| HSC006 | <i>C. tropicalis</i>   | This Study |
| HSC007 | <i>C. albicans</i>     | This Study |
| HSC007 | <i>C. albicans</i>     | This Study |
| HSC008 | <i>C. albicans</i>     | This Study |
| HSC008 | <i>C. albicans</i>     | This Study |
| HSC012 | <i>C. albicans</i>     | This Study |
| HSC012 | <i>C. albicans</i>     | This Study |
| HSC013 | <i>C. glabrata</i>     | This Study |
| HSC013 | <i>C. glabrata</i>     | This Study |
| HSC014 | <i>C. albicans</i>     | This Study |
| HSC014 | <i>C. albicans</i>     | This Study |
| HSC015 | <i>C. albicans</i>     | This Study |
| HSC015 | <i>C. albicans</i>     | This Study |
| HSC017 | <i>C. glabrata</i>     | This Study |
| HSC017 | <i>C. glabrata</i>     | This Study |
| HSC020 | <i>C. albicans</i>     | This Study |
| HSC020 | <i>C. albicans</i>     | This Study |
| HSC024 | <i>C. glabrata</i>     | This Study |
| HSC024 | <i>C. glabrata</i>     | This Study |
| HSC026 | <i>C. tropicalis</i>   | This Study |
| HSC026 | <i>C. tropicalis</i>   | This Study |
| HSC027 | <i>C. glabrata</i>     | This Study |
| HSC027 | <i>C. glabrata</i>     | This Study |
| HSC028 | <i>C. albicans</i>     | This Study |
| HSC028 | <i>C. albicans</i>     | This Study |
| HSC029 | <i>C. albicans</i>     | This Study |
| HSC029 | <i>C. albicans</i>     | This Study |



|        |                        |            |
|--------|------------------------|------------|
| HSC030 | <i>C. albicans</i>     | This Study |
| HSC030 | <i>C. albicans</i>     | This Study |
| HSC031 | <i>C. albicans</i>     | This Study |
| HSC031 | <i>C. albicans</i>     | This Study |
| HSC032 | <i>C. parapsilosis</i> | This Study |
| HSC032 | <i>C. parapsilosis</i> | This Study |
| HSC033 | <i>C. parapsilosis</i> | This Study |
| HSC033 | <i>C. parapsilosis</i> | This Study |
| HSC034 | <i>C. albicans</i>     | This Study |
| HSC034 | <i>C. albicans</i>     | This Study |
| HSC036 | <i>C. tropicalis</i>   | This Study |
| HSC036 | <i>C. tropicalis</i>   | This Study |
| HSC037 | <i>C. parapsilosis</i> | This Study |
| HSC037 | <i>C. parapsilosis</i> | This Study |
| HSC038 | <i>C. albicans</i>     | This Study |
| HSC038 | <i>C. albicans</i>     | This Study |
| HSC039 | <i>C. parapsilosis</i> | This Study |
| HSC039 | <i>C. parapsilosis</i> | This Study |
| HSC040 | <i>C. parapsilosis</i> | This Study |
| HSC040 | <i>C. parapsilosis</i> | This Study |
| HSC041 | <i>C. albicans</i>     | This Study |
| HSC041 | <i>C. albicans</i>     | This Study |
| HSC042 | <i>C. albicans</i>     | This Study |
| HSC042 | <i>C. albicans</i>     | This Study |
| HSC043 | <i>C. albicans</i>     | This Study |
| HSC043 | <i>C. albicans</i>     | This Study |
| HSC044 | <i>C. albicans</i>     | This Study |
| HSC044 | <i>C. albicans</i>     | This Study |
| HSC045 | <i>C. glabrata</i>     | This Study |
| HSC045 | <i>C. glabrata</i>     | This Study |
| HSC046 | <i>C. albicans</i>     | This Study |
| HSC046 | <i>C. albicans</i>     | This Study |
| HSC047 | <i>C. albicans</i>     | This Study |
| HSC047 | <i>C. albicans</i>     | This Study |
| HSC048 | <i>C. albicans</i>     | This Study |
| HSC048 | <i>C. albicans</i>     | This Study |
| HSC049 | <i>C. tropicalis</i>   | This Study |
| HSC049 | <i>C. tropicalis</i>   | This Study |
| HSC050 | <i>C. albicans</i>     | This Study |
| HSC050 | <i>C. albicans</i>     | This Study |

|        |                    |            |
|--------|--------------------|------------|
| HSC051 | <i>C. albicans</i> | This Study |
| HSC051 | <i>C. albicans</i> | This Study |
| HSC052 | <i>C. glabrata</i> | This Study |
| HSC052 | <i>C. glabrata</i> | This Study |
| HSC053 | <i>C. glabrata</i> | This Study |
| HSC053 | <i>C. glabrata</i> | This Study |
| HSC054 | <i>C. albicans</i> | This Study |
| HSC054 | <i>C. albicans</i> | This Study |
| HSC055 | <i>C. albicans</i> | This Study |
| HSC055 | <i>C. albicans</i> | This Study |
| HSC057 | <i>C. albicans</i> | This Study |
| HSC057 | <i>C. albicans</i> | This Study |
| HSC058 | <i>C. albicans</i> | This Study |
| HSC058 | <i>C. albicans</i> | This Study |
| HSC061 | <i>C. albicans</i> | This Study |
| HSC061 | <i>C. albicans</i> | This Study |
| HSC062 | <i>C. albicans</i> | This Study |
| HSC062 | <i>C. albicans</i> | This Study |
| HSC063 | <i>C. albicans</i> | This Study |
| HSC063 | <i>C. albicans</i> | This Study |
| HSC066 | <i>C. glabrata</i> | This Study |
| HSC066 | <i>C. glabrata</i> | This Study |
| HSC071 | <i>C. glabrata</i> | This Study |
| HSC071 | <i>C. glabrata</i> | This Study |
| HSC072 | <i>C. glabrata</i> | This Study |
| HSC072 | <i>C. glabrata</i> | This Study |
| HSC073 | <i>C. glabrata</i> | This Study |
| HSC073 | <i>C. glabrata</i> | This Study |
| HSC074 | <i>C. albicans</i> | This Study |
| HSC074 | <i>C. albicans</i> | This Study |
| HSC075 | <i>C. glabrata</i> | This Study |
| HSC075 | <i>C. glabrata</i> | This Study |
| HSC077 | <i>C. albicans</i> | This Study |
| HSC077 | <i>C. albicans</i> | This Study |
| HSC078 | <i>C. albicans</i> | This Study |
| HSC078 | <i>C. albicans</i> | This Study |
| HSC080 | <i>C. albicans</i> | This Study |
| HSC080 | <i>C. albicans</i> | This Study |
| HSC081 | <i>C. albicans</i> | This Study |
| HSC081 | <i>C. albicans</i> | This Study |

|        |                        |            |
|--------|------------------------|------------|
| HSC082 | <i>C. albicans</i>     | This Study |
| HSC082 | <i>C. albicans</i>     | This Study |
| HSC083 | <i>C. albicans</i>     | This Study |
| HSC083 | <i>C. albicans</i>     | This Study |
| HSC084 | <i>C. parapsilosis</i> | This Study |
| HSC084 | <i>C. parapsilosis</i> | This Study |
| HSC085 | <i>C. parapsilosis</i> | This Study |
| HSC085 | <i>C. parapsilosis</i> | This Study |
| HSC086 | <i>C. glabrata</i>     | This Study |
| HSC086 | <i>C. glabrata</i>     | This Study |
| HSC087 | <i>C. tropicalis</i>   | This Study |
| HSC087 | <i>C. tropicalis</i>   | This Study |
| HSC088 | <i>C. parapsilosis</i> | This Study |
| HSC088 | <i>C. parapsilosis</i> | This Study |
| HSC089 | <i>C. parapsilosis</i> | This Study |
| HSC089 | <i>C. parapsilosis</i> | This Study |
| HSC090 | <i>C. albicans</i>     | This Study |
| HSC090 | <i>C. albicans</i>     | This Study |
| HSC091 | <i>C. parapsilosis</i> | This Study |
| HSC091 | <i>C. parapsilosis</i> | This Study |
| HSC094 | <i>C. albicans</i>     | This Study |
| HSC094 | <i>C. albicans</i>     | This Study |
| HSC096 | <i>C. glabrata</i>     | This Study |
| HSC096 | <i>C. glabrata</i>     | This Study |
| HSC097 | <i>C. albicans</i>     | This Study |
| HSC097 | <i>C. albicans</i>     | This Study |
| HSC098 | <i>C. albicans</i>     | This Study |
| HSC098 | <i>C. albicans</i>     | This Study |
| HSC099 | <i>C. albicans</i>     | This Study |
| HSC099 | <i>C. albicans</i>     | This Study |
| HSC100 | <i>C. albicans</i>     | This Study |
| HSC100 | <i>C. albicans</i>     | This Study |
| HSC101 | <i>C. glabrata</i>     | This Study |
| HSC101 | <i>C. glabrata</i>     | This Study |
| HSC103 | <i>C. glabrata</i>     | This Study |
| HSC103 | <i>C. glabrata</i>     | This Study |
| HSC105 | <i>C. albicans</i>     | This Study |
| HSC105 | <i>C. albicans</i>     | This Study |
| HSC107 | <i>C. glabrata</i>     | This Study |
| HSC107 | <i>C. glabrata</i>     | This Study |

|        |                      |            |
|--------|----------------------|------------|
| HSC109 | <i>C. tropicalis</i> | This Study |
| HSC109 | <i>C. tropicalis</i> | This Study |
| HSC110 | <i>C. glabrata</i>   | This Study |
| HSC110 | <i>C. glabrata</i>   | This Study |
| HSC111 | <i>C. albicans</i>   | This Study |
| HSC111 | <i>C. albicans</i>   | This Study |
| HSC112 | <i>C. albicans</i>   | This Study |
| HSC112 | <i>C. albicans</i>   | This Study |
| HSC113 | <i>C. albicans</i>   | This Study |
| HSC113 | <i>C. albicans</i>   | This Study |
| HSC114 | <i>C. glabrata</i>   | This Study |
| HSC114 | <i>C. glabrata</i>   | This Study |
| HSC116 | <i>C. albicans</i>   | This Study |
| HSC116 | <i>C. albicans</i>   | This Study |
| HSC119 | <i>C. glabrata</i>   | This Study |
| HSC119 | <i>C. glabrata</i>   | This Study |
| HSC120 | <i>C. albicans</i>   | This Study |
| HSC120 | <i>C. albicans</i>   | This Study |
| HSC121 | <i>C. glabrata</i>   | This Study |
| HSC121 | <i>C. glabrata</i>   | This Study |
| HSC122 | <i>C. albicans</i>   | This Study |
| HSC122 | <i>C. albicans</i>   | This Study |
| HSC123 | <i>C. albicans</i>   | This Study |
| HSC123 | <i>C. albicans</i>   | This Study |
| HSC124 | <i>C. albicans</i>   | This Study |
| HSC124 | <i>C. albicans</i>   | This Study |
| HSC125 | <i>C. albicans</i>   | This Study |
| HSC125 | <i>C. albicans</i>   | This Study |
| HSC126 | <i>C. albicans</i>   | This Study |
| HSC126 | <i>C. albicans</i>   | This Study |
| HSC127 | <i>C. albicans</i>   | This Study |
| HSC127 | <i>C. albicans</i>   | This Study |
| HSC128 | <i>C. albicans</i>   | This Study |
| HSC128 | <i>C. albicans</i>   | This Study |
| HSC129 | <i>C. albicans</i>   | This Study |
| HSC129 | <i>C. albicans</i>   | This Study |
| HSC130 | <i>C. glabrata</i>   | This Study |
| HSC130 | <i>C. glabrata</i>   | This Study |
| HSC131 | <i>C. albicans</i>   | This Study |
| HSC131 | <i>C. albicans</i>   | This Study |

|        |                        |            |
|--------|------------------------|------------|
| HSC132 | <i>C. glabrata</i>     | This Study |
| HSC132 | <i>C. glabrata</i>     | This Study |
| HSC133 | <i>C. parapsilosis</i> | This Study |
| HSC133 | <i>C. parapsilosis</i> | This Study |
| HSC134 | <i>C. albicans</i>     | This Study |
| HSC134 | <i>C. albicans</i>     | This Study |
| HSC138 | <i>C. albicans</i>     | This Study |
| HSC138 | <i>C. albicans</i>     | This Study |
| HSC140 | <i>C. glabrata</i>     | This Study |
| HSC140 | <i>C. glabrata</i>     | This Study |
| HSC142 | <i>C. glabrata</i>     | This Study |
| HSC142 | <i>C. glabrata</i>     | This Study |
| HSC143 | <i>C. glabrata</i>     | This Study |
| HSC143 | <i>C. glabrata</i>     | This Study |
| HSC144 | <i>C. parapsilosis</i> | This Study |
| HSC144 | <i>C. parapsilosis</i> | This Study |
| HSC145 | <i>C. glabrata</i>     | This Study |
| HSC145 | <i>C. glabrata</i>     | This Study |
| HSC146 | <i>C. glabrata</i>     | This Study |
| HSC146 | <i>C. glabrata</i>     | This Study |
| HSC147 | <i>C. albicans</i>     | This Study |
| HSC147 | <i>C. albicans</i>     | This Study |
| HSC148 | <i>C. glabrata</i>     | This Study |
| HSC148 | <i>C. glabrata</i>     | This Study |
| HSC149 | <i>C. albicans</i>     | This Study |
| HSC149 | <i>C. albicans</i>     | This Study |
| HSC150 | <i>C. glabrata</i>     | This Study |
| HSC150 | <i>C. glabrata</i>     | This Study |
| HSC152 | <i>C. glabrata</i>     | This Study |
| HSC152 | <i>C. glabrata</i>     | This Study |
| HSC154 | <i>C. glabrata</i>     | This Study |
| HSC154 | <i>C. glabrata</i>     | This Study |
| HSC155 | <i>C. parapsilosis</i> | This Study |
| HSC155 | <i>C. parapsilosis</i> | This Study |
| HSC156 | <i>C. albicans</i>     | This Study |
| HSC156 | <i>C. albicans</i>     | This Study |
| HSC157 | <i>C. albicans</i>     | This Study |
| HSC157 | <i>C. albicans</i>     | This Study |
| HSC158 | <i>C. albicans</i>     | This Study |
| HSC158 | <i>C. albicans</i>     | This Study |

|        |                        |            |
|--------|------------------------|------------|
| HSC159 | <i>C. glabrata</i>     | This Study |
| HSC159 | <i>C. glabrata</i>     | This Study |
| HSC160 | <i>C. albicans</i>     | This Study |
| HSC160 | <i>C. albicans</i>     | This Study |
| HSC161 | <i>C. glabrata</i>     | This Study |
| HSC161 | <i>C. glabrata</i>     | This Study |
| HSC165 | <i>C. albicans</i>     | This Study |
| HSC165 | <i>C. albicans</i>     | This Study |
| HSC167 | <i>C. albicans</i>     | This Study |
| HSC167 | <i>C. albicans</i>     | This Study |
| HSC169 | <i>C. albicans</i>     | This Study |
| HSC169 | <i>C. albicans</i>     | This Study |
| HSC171 | <i>C. glabrata</i>     | This Study |
| HSC171 | <i>C. glabrata</i>     | This Study |
| HSC172 | <i>C. glabrata</i>     | This Study |
| HSC172 | <i>C. glabrata</i>     | This Study |
| HSC173 | <i>C. albicans</i>     | This Study |
| HSC173 | <i>C. albicans</i>     | This Study |
| HSC174 | <i>C. albicans</i>     | This Study |
| HSC174 | <i>C. albicans</i>     | This Study |
| HSC175 | <i>C. parapsilosis</i> | This Study |
| HSC175 | <i>C. parapsilosis</i> | This Study |
| HSC176 | <i>C. albicans</i>     | This Study |
| HSC176 | <i>C. albicans</i>     | This Study |
| HSC177 | <i>C. glabrata</i>     | This Study |
| HSC177 | <i>C. glabrata</i>     | This Study |
| HSC178 | <i>C. parapsilosis</i> | This Study |
| HSC178 | <i>C. parapsilosis</i> | This Study |
| HSC179 | <i>C. parapsilosis</i> | This Study |
| HSC179 | <i>C. parapsilosis</i> | This Study |
| HSC180 | <i>C. albicans</i>     | This Study |
| HSC180 | <i>C. albicans</i>     | This Study |
| HSC181 | <i>C. tropicalis</i>   | This Study |
| HSC181 | <i>C. tropicalis</i>   | This Study |
| HSC182 | <i>C. albicans</i>     | This Study |
| HSC182 | <i>C. albicans</i>     | This Study |
| HSC183 | <i>C. glabrata</i>     | This Study |
| HSC183 | <i>C. glabrata</i>     | This Study |
| HSC184 | <i>C. parapsilosis</i> | This Study |
| HSC184 | <i>C. parapsilosis</i> | This Study |

|        |                        |            |
|--------|------------------------|------------|
| HSC185 | <i>C. albicans</i>     | This Study |
| HSC185 | <i>C. albicans</i>     | This Study |
| HSC186 | <i>C. glabrata</i>     | This Study |
| HSC186 | <i>C. glabrata</i>     | This Study |
| HSC187 | <i>C. albicans</i>     | This Study |
| HSC187 | <i>C. albicans</i>     | This Study |
| HSC188 | <i>C. glabrata</i>     | This Study |
| HSC188 | <i>C. glabrata</i>     | This Study |
| HSC189 | <i>C. glabrata</i>     | This Study |
| HSC189 | <i>C. glabrata</i>     | This Study |
| HSC190 | <i>C. albicans</i>     | This Study |
| HSC190 | <i>C. albicans</i>     | This Study |
| HSC191 | <i>C. glabrata</i>     | This Study |
| HSC191 | <i>C. glabrata</i>     | This Study |
| HSC192 | <i>C. glabrata</i>     | This Study |
| HSC192 | <i>C. glabrata</i>     | This Study |
| HSC193 | <i>C. albicans</i>     | This Study |
| HSC193 | <i>C. albicans</i>     | This Study |
| HSC194 | <i>C. albicans</i>     | This Study |
| HSC194 | <i>C. albicans</i>     | This Study |
| HSC196 | <i>C. parapsilosis</i> | This Study |
| HSC196 | <i>C. parapsilosis</i> | This Study |
| HSC197 | <i>C. albicans</i>     | This Study |
| HSC197 | <i>C. albicans</i>     | This Study |
| HSC198 | <i>C. parapsilosis</i> | This Study |
| HSC198 | <i>C. parapsilosis</i> | This Study |
| HSC199 | <i>C. albicans</i>     | This Study |
| HSC199 | <i>C. albicans</i>     | This Study |
| HSC201 | <i>C. albicans</i>     | This Study |
| HSC201 | <i>C. albicans</i>     | This Study |
| HSC202 | <i>C. glabrata</i>     | This Study |
| HSC202 | <i>C. glabrata</i>     | This Study |
| HSC203 | <i>C. glabrata</i>     | This Study |
| HSC203 | <i>C. glabrata</i>     | This Study |
| HSC204 | <i>C. albicans</i>     | This Study |
| HSC204 | <i>C. albicans</i>     | This Study |
| HSC205 | <i>C. glabrata</i>     | This Study |
| HSC205 | <i>C. glabrata</i>     | This Study |
| HSC206 | <i>C. albicans</i>     | This Study |
| HSC206 | <i>C. albicans</i>     | This Study |



|                   |                    |                   |
|-------------------|--------------------|-------------------|
| HSC207            | <i>C. albicans</i> | This Study        |
| HSC207            | <i>C. albicans</i> | This Study        |
| HSC208            | <i>C. glabrata</i> | This Study        |
| HSC208            | <i>C. glabrata</i> | This Study        |
| HSC209            | <i>C. glabrata</i> | This Study        |
| HSC209            | <i>C. glabrata</i> | This Study        |
| HSC210            | <i>C. albicans</i> | This Study        |
| HSC210            | <i>C. albicans</i> | This Study        |
| 12C               | <i>C. albicans</i> | (53)              |
| 73/025            | <i>C. albicans</i> | (54)              |
| 78/028            | <i>C. albicans</i> | (54)              |
| 81/064            | <i>C. albicans</i> | (54)              |
| AM2003-013        | <i>C. albicans</i> | (54)              |
| AM2003/0069       | <i>C. albicans</i> | (54)              |
| AM2003/0074       | <i>C. albicans</i> | (54)              |
| AM2003/0089       | <i>C. albicans</i> | (54)              |
| AM2003/0165       | <i>C. albicans</i> | (54)              |
| AM2003/0182       | <i>C. albicans</i> | (54)              |
| AM2003/0191       | <i>C. albicans</i> | (54)              |
| AM2003/020        | <i>C. albicans</i> | (54)              |
| AM2004/0028       | <i>C. albicans</i> | (54)              |
| AM2005/0377       | <i>C. albicans</i> | (54)              |
| Ca 81             | <i>C. albicans</i> | (55)              |
| CAI4 F2           | <i>C. albicans</i> | (56)              |
| DSY294            | <i>C. albicans</i> | (57)              |
| DSY296            | <i>C. albicans</i> | (57)              |
| DSY3534           | <i>C. albicans</i> | (58)              |
| DSY3548           | <i>C. albicans</i> | (58)              |
| DSY3549           | <i>C. albicans</i> | (58)              |
| E2 from Magee lab | <i>C. albicans</i> | E2 from Magee lab |
| HUN68             | <i>C. albicans</i> | (54)              |
| HUN92             | <i>C. albicans</i> | (54)              |
| HUN96             | <i>C. albicans</i> | (54)              |
| IHEM16614         | <i>C. albicans</i> | (54)              |
| IHEM16945         | <i>C. albicans</i> | (54)              |
| IHEM3742          | <i>C. albicans</i> | (54)              |
| J951361           | <i>C. albicans</i> | (54)              |
| J981315           | <i>C. albicans</i> | (54)              |
| L1086             | <i>C. albicans</i> | (54)              |
| L26               | <i>C. albicans</i> | (53)              |

|             |                    |      |
|-------------|--------------------|------|
| MYA3404     | <i>C. albicans</i> | (59) |
| P34048      | <i>C. albicans</i> | (49) |
| P37005      | <i>C. albicans</i> | (53) |
| P37037      | <i>C. albicans</i> | (53) |
| P37039      | <i>C. albicans</i> | (53) |
| P57055      | <i>C. albicans</i> | (60) |
| P57072      | <i>C. albicans</i> | (60) |
| P60002      | <i>C. albicans</i> | (49) |
| P75010      | <i>C. albicans</i> | (60) |
| P75016      | <i>C. albicans</i> | (60) |
| P75063      | <i>C. albicans</i> | (60) |
| P76055      | <i>C. albicans</i> | (49) |
| P76067      | <i>C. albicans</i> | (60) |
| P78042      | <i>C. albicans</i> | (60) |
| P78048      | <i>C. albicans</i> | (49) |
| P87         | <i>C. albicans</i> | (49) |
| P94015      | <i>C. albicans</i> | (49) |
| PT14 TC2440 | <i>C. albicans</i> | (61) |
| PT14 TC2501 | <i>C. albicans</i> | (61) |
| PT14 TC580  | <i>C. albicans</i> | (61) |
| PT15 TC1619 | <i>C. albicans</i> | (61) |
| PT15 TC945  | <i>C. albicans</i> | (61) |
| PT16 TC3107 | <i>C. albicans</i> | (61) |
| PT16 TC3119 | <i>C. albicans</i> | (61) |
| PT16 TC3120 | <i>C. albicans</i> | (61) |
| PT30 TC5106 | <i>C. albicans</i> | (61) |
| PT30 TC5108 | <i>C. albicans</i> | (61) |
| PT43 TC3034 | <i>C. albicans</i> | (61) |
| PT59 TC3917 | <i>C. albicans</i> | (61) |
| PT59 TC4617 | <i>C. albicans</i> | (61) |
| PT59 TC4639 | <i>C. albicans</i> | (61) |
| PT7 TC2307  | <i>C. albicans</i> | (61) |
| PT7 TC412   | <i>C. albicans</i> | (61) |
| PT9 TC3795  | <i>C. albicans</i> | (61) |
| s20122.073  | <i>C. albicans</i> | (54) |
| s20152.082  | <i>C. albicans</i> | (54) |
| s20175.016  | <i>C. albicans</i> | (54) |
| s20176.079  | <i>C. albicans</i> | (54) |
| T101        | <i>C. albicans</i> | (54) |
| T118        | <i>C. albicans</i> | (62) |

|             |                    |                   |
|-------------|--------------------|-------------------|
| TW05404     | <i>C. albicans</i> | Ted White Strains |
| TW05405     | <i>C. albicans</i> | Ted White Strains |
| TW06017 FH8 | <i>C. albicans</i> | Ted White Strains |
| TW06019     | <i>C. albicans</i> | Ted White Strains |
| TW06021     | <i>C. albicans</i> | Ted White Strains |
| TW07229     | <i>C. albicans</i> | Ted White Strains |
| TW07231     | <i>C. albicans</i> | Ted White Strains |
| TWTC11      | <i>C. albicans</i> | (61)              |

530

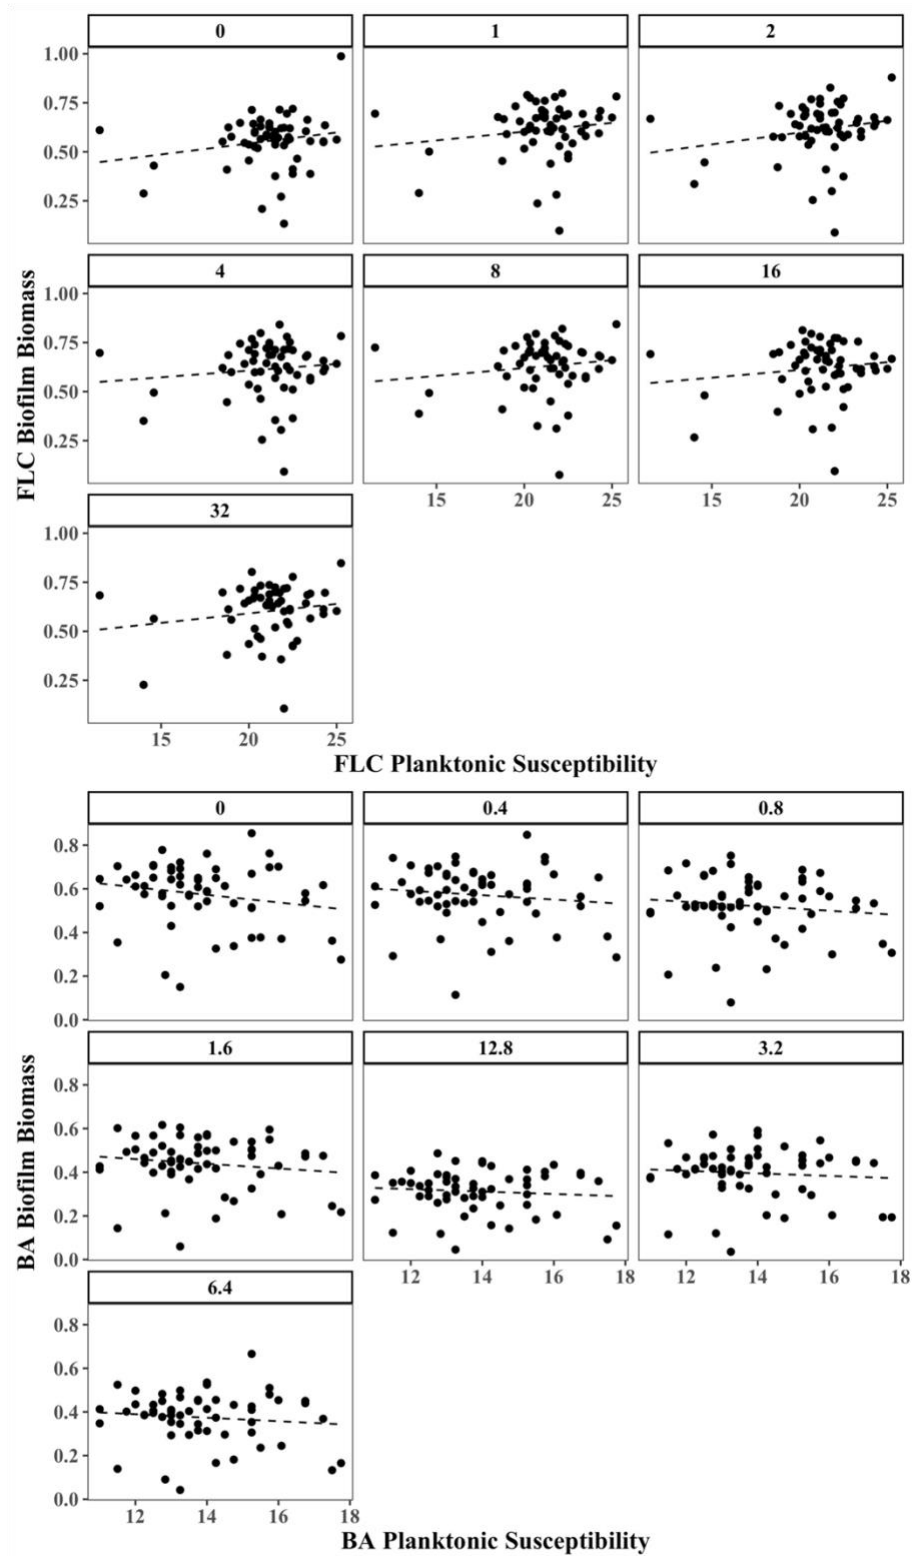

531

**Supplementary Figure 1** Association of planktonic susceptibility and biofilm biomass of *C. albicans* isolates. There is no association between planktonic susceptibility and biomass of the biofilms for both FLC and BA (linear mixed-effect model).

532

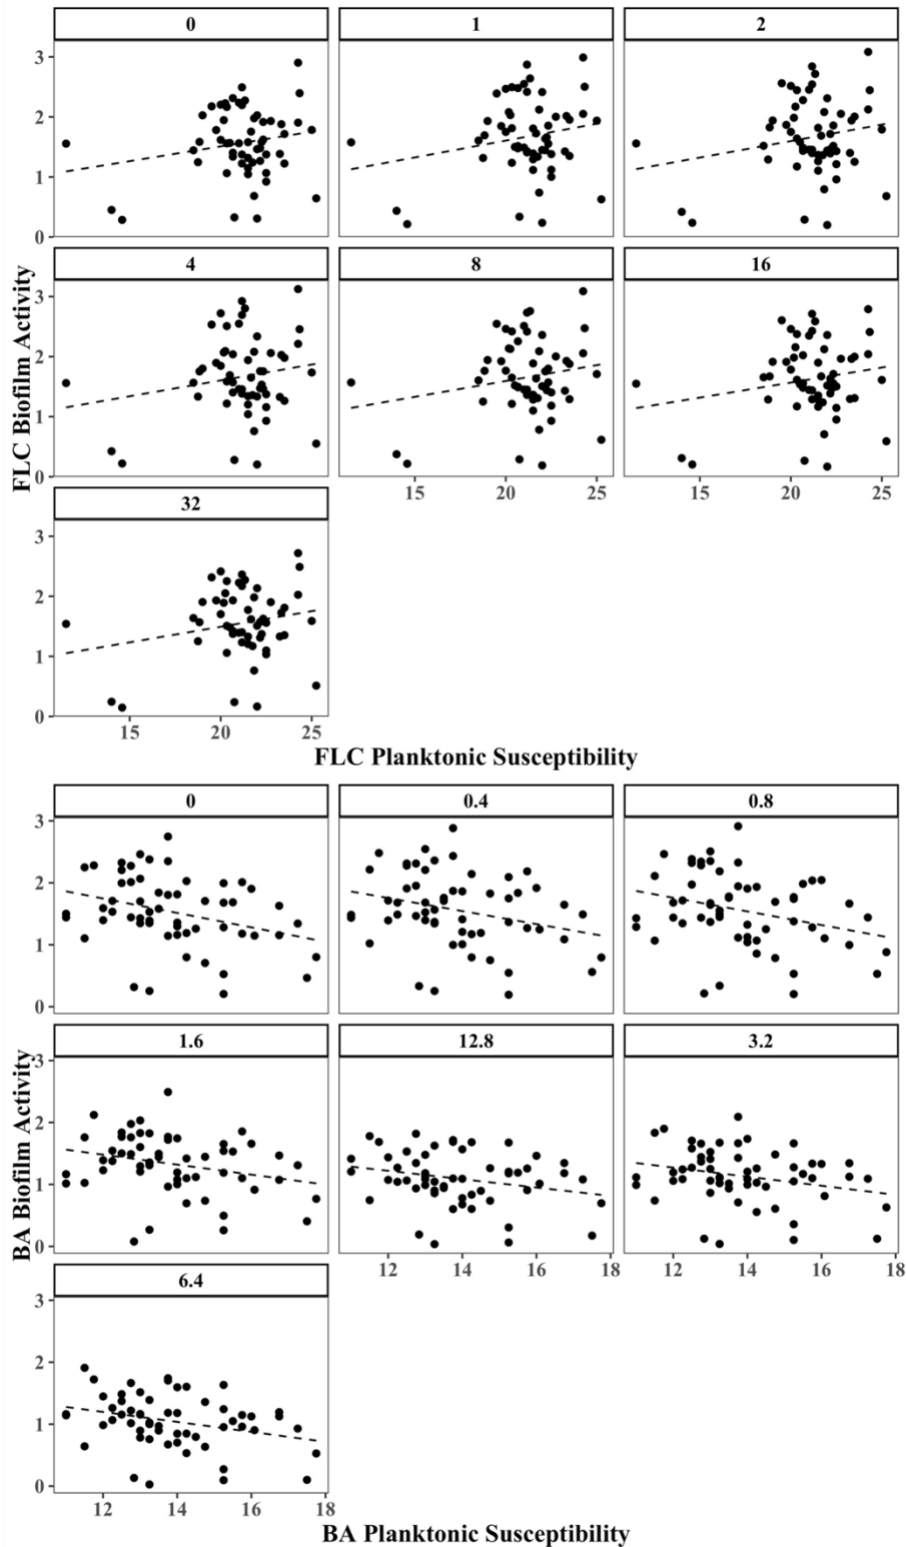

533 **Supplementary Figure 2** Association of planktonic susceptibility and biofilm activity of *C. albicans* isolates. There is an association between BA planktonic susceptibility and biomass of the biofilms; however, this association absent in FLC (linear mixed-effect model).

534

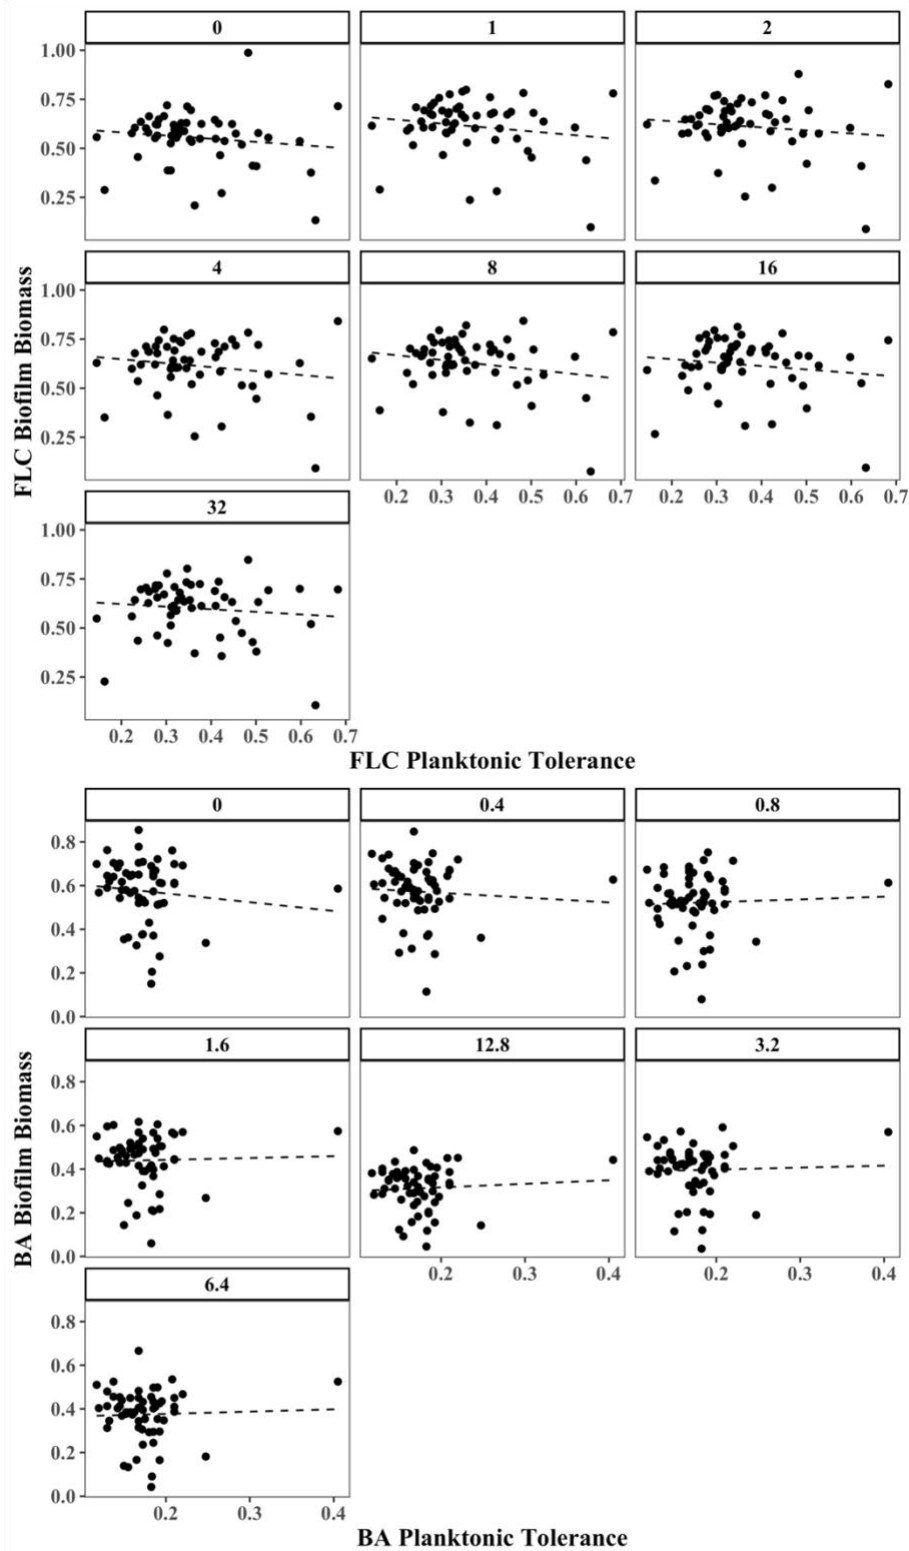

535 **Supplementary Figure 3** Association of planktonic tolerance and biofilm biomass of *C. albicans* isolates. There is no association between planktonic tolerance and biomass of the biofilms for both FLC and BA (linear mixed-effect model).

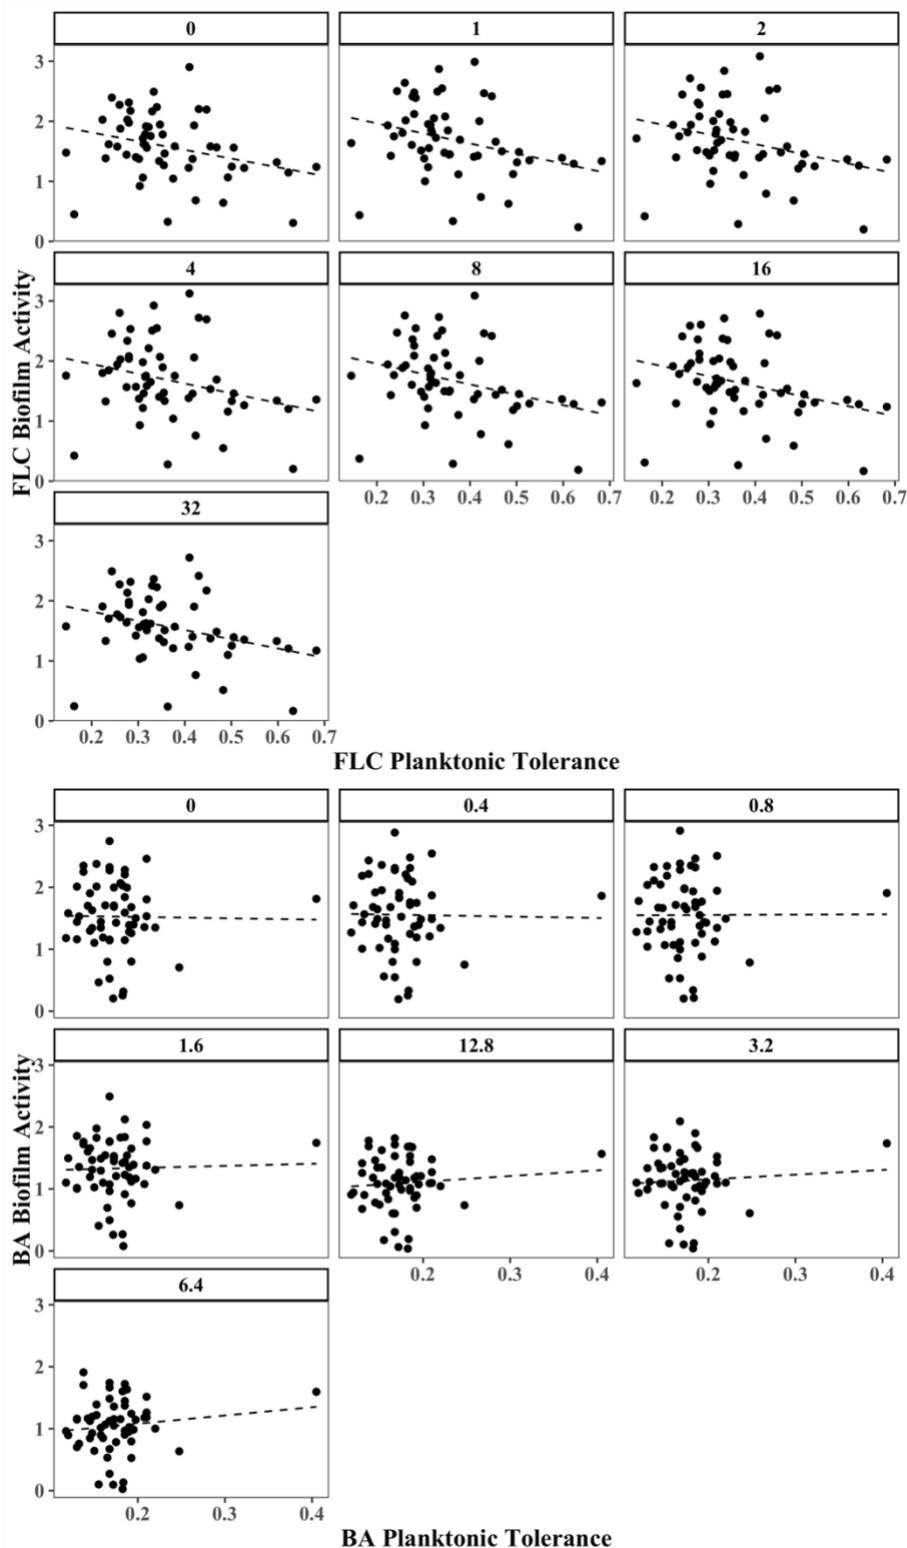

536 **Supplementary Figure 4** Association of planktonic tolerance and biofilm activity of *C. albicans* isolates. There is an association between FLC planktonic tolerance and activity of the biofilms (linear mixed-effect model); however, this association is absent in BA.
